# Supplementary material for: Association of serum fetuin-B with insulin resistance and pre-diabetes in young Chinese women: evidence from a cross-sectional study and effect of liraglutide
Source: PeerJ. 2021 Aug 20;9:e11869. doi: 10.7717/peerj.11869 (PMC8381879; doi:10.7717/peerj.11869)
Supplement: Supplemental Information 1 — The raw data were used for statistical analysis to identify the relationship between Fetuin-B and pre-diabetes. [file peerj-09-11869-s001.xlsx]

## Sheet: young woman
Group	Diagnosis	Number	FtB（mg/L）	WC	OB	BMI	IR	M value	Age	Gender	Height	Weight	HC	WHR	SBP	DBP	FAT（%）	OGTT-0h	OGTT-30min	OGTT-1h	OGTT-2h	OGIRT-0h	OGIRT-30min	OGIRT-1h	OGIRT-2h	TG	TC	HDL	LDL	FFA	HbA1c（%）	HOMA2-IR	AUCg	AUCi	Blood glucose	GIR
1	IGT	S371	0.968331	72	0	17.2248	0	7.03	25	女	1.58	43	82	0.878049	100	73	21.4	4.99	9.04	11.45	8.61	4.29	27.52	61.31	67.97	0.56	3.94	1.83	1.67	0.76	5.6	0.645578	18.66	94.8	-0.25	0.26	-0.12
0	NGT	NS99-120	5.19903	63	0	17.3047	0	7.28	26	女	1.6	44.3	82	0.768293	102	68	19.5	4.78	8.12	6.24	5.52	10.253	150.294	110.992	46.481	0.48	3.71	1.17	2.23	0.47	5.3	1.49925	12.695	184.195	-0.32	0.07	-0.33
0	NGT	NS62-0	7.07859	68	0	17.3817	0	10.59	25	女	1.56	42.3	73	0.931507	116	82	19.5	4.36	6.56	6.21	5.7	5.681	127.781	103.792	54.216	0.43	2.57	0.69	1.56	0.35	5.4	0.81367	11.8775	170.263	-0.37	-0.16	-0.46
0	NGT	NS113	9.29947	70	0	17.4105	0	12.73	25	女	1.65	47.4	85	0.823529	94	62	17.8	4.2			4.6	5.19			13.16	1	3.31	0.97	1.94	0.25	5.1	0.734754	3.35	7.8775	0	-0.01	-0.6
0	NGT	A8	4.40049	58	0	17.4251	0	9.52	27	女	158	43.5	87	0.666667	94	60		4.83	7.19	6.47	6.33	4.23	82.53	75.87	47.43	0.71	5.14	1.36	3.36	0.47	5	0.629723	12.82	122.94	-0.15	0.13	-0.33
1	IGT	S416	3.52212	66	0	17.4818	0	6.99	30	女	1.55	42	81	0.814815	101	80	24.6	4.64	9.39	11.9	9.88	6.24	41.08	83.53	170.2	1.11	4.36	1.42	2.28	1.06	4.6	0.911577	19.72	169.847	0.05	0.15	0.03
0	NGT	NS52-0	8.68649	56	0	17.5453	0	11.46	25	女	1.58	43.8	78	0.717949	115	72	23.3	4.27	8.36	4.98	4.89	6.098	43.496	24.759	9.052	1	4.46	1.07	2.98	0.3	5	0.865801	11.4275	46.3678	0	0.03	-0.52
0	NGT	NS34-80	8.19476	62	0	17.6417	0	7.99	27	女	1.59	44.6	87	0.712644	106	80	20.3	3.85	4.27	2.89	4.55	5.23	140.3	24.44	41.85	0.35	2.99	1.29	1.28	0.58	5	0.71736	7.54	110.713	-0.46	0.11	-0.24
0	NGT	A23	5.90578	57	0	17.6855	0	11.73	24	女	153	41.4	77	0.74026	94	55		4.7	7.53	6.88	7.39	3.32	56.59	45.87	54.07	0.85	4.4	1.96	2.49	0.38	5.1	0.490677	13.795	90.5625	-0.07	0.29	-0.42
0	NGT	NS117	7.58978	66	0	17.6899	0	10.29	33	女	1.55	42.5	83	0.795181	93	52	19	4.56			5.57	3.96			67.77	0.4	3.84	1.52	2.02	0.57	5.4	0.578369	3.925	34.875	-0.4	0.18	-0.24
0	NGT	NS58-0	5.23386	69	0	17.735	0	8.31	25	女	1.64	47.7	82	0.841463	120	80	22.2	4.37	5.72	5.43	4.66	7.01	200.602	88.225	57.015	1.12	4.38	0.93	2.9	1	5.2	1.001	10.355	196.73	0.05	-0.03	0
0	NGT	NS50-0	14.5198	60	0	17.7722	0	11.14	27	女	1.64	47.8	85	0.705882	90	60	24.4	4.47	7.06	4.87	4.08	5.973	20.909	25.302	5.951	0.73	4.87	1.86	2.49	0.36	5.4	0.862069	10.34	33.8997	-0.14	0.27	-0.44
0	NGT	NS119	1.0728	72	0	17.878	0	11.13	24	女	1.63	47.5	89	0.808989	96	58	21.8	4.6			5.1	6.2			24.3	1.07	3.94	1.34	2.32	0.36	4.9	0.903342	3.7	13.7	0.03	0.13	-0.44
0	NGT	NS94-100	6.17183	67	0	18.0232	0	7.72	25	女	1.62	47.3	88	0.761364	100	79	24.4	3.89	7.36	5.53	5.19	6.646	58.692	25.179	25.034	2.65	4.7	1.14	3.09	0.94	5.7	0.912409	11.395	62.4087	0.42	0.06	-0.03
0	NGT	NS015-0	8.42815	61	0	18.066	0	10.3	24	女	1.58	45.1	81	0.753086	102	78	22.2	4.48	7.09	3.4	4.25	5.25	117.8	27.7	37.41	0.48	2.45	0.91	1.11	0.23	5	0.759878	9.34	99.6925	-0.32	-0.04	-0.64
1	IGT	S361	9.9907	67	0	18.1641	1	6.14	19	女	1.6	46.5	85	0.782353	111	71	24.9	5.07	8.94	11.04	10.34	7.9	41.29	43.7	45.64	2.33	4.65	1	2.62	0.89	6.4	1.18343	19.1875	78.215	0.37	0	-0.05
0	NGT	NS18-0	1.0877	67	0	18.1787	0	10.85	33	女	1.52	42	80	0.8375	103	83	23.2	3.79	4.37	4.24	4.46	7.89	126.7	72.78	86.25	0.91	4.56	1.26	2.9	0.37	5.4	1.06952	8.5425	163.032	-0.04	0.1	-0.43
0	NGT	A13	4.36279	58	0	18.1862	0	10.5	25	女	158	45.4	78	0.74359	97	63		5.07	6.94	6.68	4.71	8.73	130.4	105.5	30.01	0.91	4.25	1.81	2.77	0.47	5.2	1.30548	12.1025	161.512	-0.04	0.26	-0.33
0	NGT	NS109-0	6.84983	66	0	18.1894	0	13.1	25	女	1.55	43.7	85	0.776471	118	58	24.4	5.04	7.4	5.13	4.76	6.345	72.873	45.637	34.495	0.7	3.41	1.25	1.75	0.53	5.2	0.952381	11.1875	89.498	-0.15	0.1	-0.28
0	NGT	A7	3.296	63	0	18.1955	0	11.15	24	女	159	46	82	0.768293	114	81		4.93	6.69	5.73	5.75	7.29	76.14	55.51	54.79	0.91	4.78	2.17	2.56	0.46	5.2	1.0846	11.75	108.92	-0.04	0.34	-0.34
0	NGT	ns103	9.13846	72	0	18.2151	0	11.59	28	女	1.67	50.8	89	0.808989	125	84	21.7	4.43	4.69	2.95	3.23	6.253	47.449	9.733	39.2	0.25	2	0.73	0.98	0.26	5.4	0.899281	7.28	52.1875	-0.6	-0.14	-0.59
0	NGT	ns42-120'	9.04539	64	0	18.2262	0	10.41	24	女	1.58	45.5	85	0.752941	112	76	20.5	4.43	4.67	3.44	4.43	6.92	94.52	36.73	43.03	0.55	2.58	0.97	1.23	0.38	4.8	0.993049	8.2375	98.0525	-0.26	-0.01	-0.42
0	NGT	NS59-0	1.12141	62	0	18.2812	0	12.96	24	女	1.6	46.8	85	0.729412	98	68	21.5	4.11	8.02	8.79	7.56	5.883	92.892	100.781	60.506	1.56	3.68	0.96	2.29	0.79	5.1	0.825083	15.41	153.756	0.19	-0.02	-0.1
0	NGT	ns78	2.19308	68	0	18.3111	0	7.11	26	女	1.5	41.2	72	0.944444	120	70	23.3	4.32	11.04	7.67	6.77	6.731	233.205	49.684	91.724	0.47	3.09	0.99	1.73	0.31	5.3	0.958773	15.7375	201.41	-0.33	0	-0.51
0	NGT	NS037-0	4.24778	63	0	18.3111	0	15.24	29	女	1.5	41.2	85	0.741176	110	82	20.7	3.51	6.28	4.87	4.49	7.175	16.267	22.972	22.333	1.09	4.59	1.46	2.49	0.75	5	0.94697	9.915	38.3227	0.04	0.16	-0.12
0	NGT	A11	8.92993	64	0	18.3594	0	10.95	25	女	160	47	86	0.744186	106	60		4.92	8.12	6.74	6.16	6.71	59.69	45.24	46.39	1.07	4.01	1.47	2.25	0.54	5	0.999001	13.425	88.6475	0.03	0.17	-0.27
0	NGT	A14	6.66828	62	0	18.4328	0	11.32	24	女	159	46.6	83	0.746988	118	68		4.95	7.16	5.13	4.4	5.17	61.76	53.53	37.38	0.78	4.85	2.15	2.75	0.52	5.2	0.773994	10.865	91.01	-0.11	0.33	-0.28
0	NGT	NS035-0	1.11799	63	0	18.4375	0	9.49	27	女	1.6	47.2	84	0.75	106	83	22.8	4.71	8.28	6.39	5.08	8.03	87.29	75.11	38.88	0.39	2.81	1.38	1.06	0.53	5.7	1.17371	12.65	121.425	-0.41	0.14	-0.28
1	IGT	A12	4.47409	65	0	18.4997	0	6.35	25	女	157	45.6	87	0.747126	107	75		4.5	8.89	9.53	8.93	7.22	60.34	70.93	123.4	1.3	4.38	1.74	2.35	0.69	6.3	1.04167	17.1825	146.873	0.11	0.24	-0.16
0	NGT	NS56-0	1.32141	64	0	18.5547	0	13.54	27	女	1.6	47.5	82	0.780488	100	80	22.2	4.59	9.09	6.16	6.25	7.19	288.308	76.079	110.234	0.86	4.6	1.63	2.47	0.64	5.7	1.04384	13.4375	258.128	-0.07	0.21	-0.19
0	NGT	NS97	12.1425	71	0	18.5547	0	10.72	30	女	1.6	47.5	91	0.78022	104	63	24.8	4.34	9.9	8.71	6.87	15.384	142.22	103.592	40.459	1.62	4.23	1.13	2.55	0.92	4.8	2.15054	16.0025	172.88	0.21	0.05	-0.04
2	IR	S377	0.966229	67	0	18.5566	1	5.43	24	女	1.62	48.7	90	0.744444	112	90	24.3	5.43	8.97	6.51	5.63	7.03	180.5	145.7	114.5	0.66	3.41	1.38	1.78	0.46	5.3	1.07991	13.54	258.533	-0.18	0.14	-0.34
0	NGT	NS009-0	1.11714	61	0	18.5868	0	15.66	28	女	1.58	46.4	83	0.73494	108	72	23.4	4.58	8.12	5.66	4.55	8.89	85.99	80.44	45.13	0.8	1.77	0.57	1.23	0.23	5.7	1.28535	11.725	128.113	-0.1	-0.24	-0.64
0	NGT	NS09-0	7.11911	61	0	18.5868	0	15.66	24	女	1.58	46.4	83	0.73494	104	82	23.2	4.97	8.02	5.61	4.45	9.89	87.99	79.44	46.13	0.74	1.97	0.51	1.03	0.2	4.9	1.46628	11.685	129.113	-0.13	-0.29	-0.7
0	NGT	NS046	9.81233	65	0	18.5947	0	9.73	27	女	1.62	48.8	86	0.755814	106	80	20.5	3.67	9	9.01	6.15	4.806	96.326	79.379	44.384	1.57	3.52	0.86	2.09	1.04	5.3	0.648508	15.25	131.091	0.2	-0.07	0.02
0	NGT	NS49-0	1.1351	69	0	18.6366	0	11	24	女	1.68	52.6	83	0.831325	108	70	23.7	4.5	7.29	5.8	4.28	9.697	90.192	102.914	37.732	0.58	3.38	1.17	1.79	0.19	5.3	1.39082	11.26	143.572	-0.24	0.07	-0.72
0	NGT	A6	8.47967	70	0	18.662	0	8.54	24	女	157	46	90	0.777778	110	68		5.05	8.77	6.51	5.67	9.1	133.8	68.29	79.65	0.82	2.84	1.5	1.28	0.57	5.4	1.3587	13.365	160.218	-0.09	0.18	-0.24
1	IGT	S482	6.61249	76	0	18.6669	1	5.55	28	女	1.58	46.6	89	0.853933	104	79	26.3	4.7	8.79	9.35	8.02	9.55	132.6	174.7	200.4	0.62	4.1	1.03	2.1	0.71	4.8	1.39082	16.5925	299.913	-0.21	0.01	-0.15
0	NGT	NS32-0	8.51373	69	0	18.6701	0	12.08	27	女	1.59	47.2	90	0.766667	108	76	24.2	4.52	8.25	7.55	6.45	5.94	84.52	89.89	52.48	0.74	1.95	0.53	1.23	0.2	5	0.860585	14.1425	137.403	-0.13	-0.28	-0.7
0	NGT	A10	7.54773	60	0	18.7097	0	10.29	23	女	159	47.3	91	0.659341	116	73		4.78	7.38	7.01	6.02	7.85	54.57	46.92	61.91	0.99	5.46	2.05	3.26	0.5	5	1.1534	13.1525	95.3925	0	0.31	-0.3
0	NGT	A21	6.58508	65	0	18.75	0	12.73	26	女	160	48	90	0.722222	95	61		4.78	8.05	5.59	6.49	5.33	65.61	47.62	43.4	0.6	5.04	2.28	3.06	0.8	5.1	0.788644	12.6575	91.5525	-0.22	0.36	-0.1
0	NGT	NS98-0	5.62084	65	0	18.7962	0	15.23	26	女	1.53	44	86	0.755814	110	70	22.4	4.53	8.47	7.15	6.98	9.45			24.21	0.67	3.62	1.31	1.58	0.39	5	1.3587	14.22	14.4675	-0.17	0.12	-0.41
0	NGT	A24	4.82801	68	0	18.8062	0	10.29	24	女	165	51.2	85	0.8	110	70		5.02	7.93	7.87	5.87	5.06	31.5	40.95	42.04	0.6	4.17	1.77	2.43	0.57	5	0.761035	14.0575	68.7475	-0.22	0.25	-0.24
0	NGT	NS53-100	7.74267	65	0	18.8137	0	9.49	32	女	1.55	45.2	85	0.764706	106	78	23.7	3.6	6.83	7.75	6.56	4.856	80.267	90.528	41.57	0.65	3.64	1.14	2.17	0.76	5.1	0.650618	13.4075	130.029	-0.19	0.06	-0.12
0	NGT	NS76-0	1.1103	65	0	18.8609	0	10.43	24	女	1.56	45.9	89	0.730337	103	80	23	4.9	8.31	7.73	6.91	9.196	112.278	81.123	139.275	1.3	4.25	1.31	2.49	0.36	5.3	1.3587	14.6325	188.918	0.11	0.12	-0.44
0	NGT	NS71-0	4.11565	66	0	18.8776	0	12.24	26	女	1.4	37	82	0.804878	96	67	24	4.31	7.25	4.61	5.4	7.381	58.351	27.433	8.467	0.68	3.65	1.09	2.01	0.83	5	1.04822	10.86	55.829	-0.17	0.04	-0.08
0	NGT	NS105-0	10.2978	73	0	18.8876	0	7.99	24	女	1.64	50.8	92	0.793478	125	84	27	3.86	7.55	6.04	5.42	7.005	25.377	102.05	32.939	0.46	2.76	1.13	1.29	0.74	5.2	0.957854	11.98	107.447	-0.34	0.05	-0.13
0	NGT	NS47-0	10.2577	67	0	18.897	0	8.1	25	女	1.55	45.4	86	0.77907	104	82	22.5	4.49	10.31	9.29	7.15	4.917	120.3	258.754	105.064	0.35	3.81	1.33	2.17	0.58	5.6	0.712758	16.82	307.977	-0.46	0.12	-0.24
0	NGT	NS83-0	2.6036	70	0	18.9062	0	11.55	25	女	1.6	48.4	83	0.843373	97	65	25	4.37	5.14	3.53	3.82	10	88.44	78.663	37.363	1.14	4.94	1.55	2.87	0.6	5	1.41844	8.22	124.399	0.06	0.19	-0.22
0	NGT	A30	7.43176	62	0	18.9243	0	9.64	24	女	153	44.3	79	0.78481	101	61		4.57	8.07	9.13	7	2.93	70.12	125.2	108.2	0.91	4.25	1.51	2.77	0.49	4.8	0.429369	15.525	183.792	-0.04	0.18	-0.31
0	NGT	NS124	8.99681	77	0	18.9453	0	11.73	27	女	1.6	48.5	90	0.855556	105	62	29.4	5.15			5.95	8.71			19.81	1.43	4.23	0.99	3.21	0.43	5	1.3089	4.2625	12.0825	0.16	0	-0.37
0	NGT	A4	3.38133	62	0	18.9745	0	11	24	女	154	45	90	0.688889	93	59		4.6	8.25	7.45	4.85	5.59	59.21	119.5	24.38	0.44	4.51	2.38	2.31	0.57	5.1	0.815661	13.2875	132.817	-0.36	0.38	-0.24
2	IR	S184	4.60325	70	0	19.1075	1	4.76	26	女	1.56	46.5	84	0.833333	115	75	25.5	3.6	6.03	8.9	7.11	7.09	44.49	75.61	80.37	2.37	6.1	0.57	2.75	0.58	5.1	0.94518	14.145	120.91	0.37	-0.24	-0.24
0	NGT	A3	3.64718	66	0	19.1351	0	9.91	25	女	161	49.6	94	0.702128	98	59		4.46	9.29	8.73	7.55	3.42	80.56	71.96	59.27	1.12	5.11	1.67	3.26	0.53	5.1	0.496524	16.0825	124.74	0.05	0.22	-0.28
0	NGT	NS120	1.33626	68	0	19.1807	0	10.1	26	女	1.53	44.9	87	0.781609	100	62	24.5	5.03			5.08	6.56			26.29	1.19	3.52	0.9	2.12	0.45	5	0.984252	3.7975	14.785	0.08	-0.05	-0.35
0	NGT	A20	3.54907	62	0	19.2175	0	10.13	29	女	152	44.4	85	0.729412	94	56		4.91	7.49	5.87	4.73	5.51	55.57	51.51	26.08	0.55	4.02	1.6	2.49	0.77	4.9	0.821693	11.74	80.835	-0.26	0.2	-0.11
0	NGT	NS93-0	1.12697	60	0	19.2188	0	10.29	25	女	1.6	49.2	90	0.666667	109	68	23.1	5.04	8.72	8.13	5.8	4.556	22.517	43.038	32.907	1.65	4.53	0.93	3.17	0.88	5.3	0.687285	14.6175	61.1295	0.22	-0.03	-0.06
0	NGT	NS16	1.15396	64	0	19.2277	0	14.86	33	女	1.58	48	86	0.744186	98	72	22	4.14	7.14	5.88	5.35	4.48	39.95	39.36	24.21	0.49	4.68	1.78	2.07	0.36	5	0.632111	11.69	62.72	-0.31	0.25	-0.44
0	NGT	0	1.25877	73	0	19.2706	0	8.07	24	女	1.63	51.2	86	0.848837	102	78	22.5	4.03	6.62	4.6	4.37	6.885	302.666	47.449	49.357	0.6	4.81	1.69	2.57	0.96	4.9	0.956023	9.9525	213.32	-0.22	0.23	-0.02
0	NGT	ns44	0.975484	76	0	19.2969	0	8.5	24	女	1.6	49.4	89	0.853933	114	70	25.3	4.26	7.32	5.81	4.83	6.658	106.523	37.401	19.742	0.66	3.51	1.32	1.81	0.39	5.1	0.943396	11.4975	92.8478	-0.18	0.12	-0.41
0	NGT	ns81-120'		71	0	19.3333	0	11.05	24	女	1.5	43.5	85	0.835294	98	72	26.2	4.71	7.09	6.06	6.17	5.32	15.552	17.243	13.382	1.77	4.05	1.03	2.53	0.82	5.1	0.783085	12.3525	28.7293	0.25	0.01	-0.09
0	NGT	NS74-0	1.05793	68	0	19.3479	0	11.58	25	女	1.58	48.3	89	0.764045	110	80	26.4	4.69	7.11	7.98	4.56	5.703	33.572	110.57	22.942	2.24	3.4	0.82	2.11	0.73	5.5	0.837521	12.9925	112.61	0.35	-0.09	-0.14
0	NGT	NS28-0	8.07574	67	0	19.3479	0	11.92	27	女	1.58	48.3	88	0.761364	108	70	23	3.98	6.39	6.42	5.46	7.443	28.493	37.019	23.183	0.57	3.26	1.34	1.48	0.49	5.1	1.02775	11.735	55.463	-0.24	0.13	-0.31
0	NGT	NS92-0	1.09367	75	0	19.428	0	15.29	25	女	1.58	48.5	90	0.833333	115	76	25.9	4.21	10.07	7.82	6.8	6.343	101.836	53.183	20.371	2.42	4.23	0.89	2.6	0.44	4.9	0.896057	15.3525	102.576	0.38	-0.05	-0.36
0	NGT	NS48-0	3.59656	70	0	19.5649	0	12.59	24	女	1.54	46.4	86	0.813953	108	76	25.4	4	6.28	4.87	4.49	7.175	16.267	22.972	22.333	0.44	3.55	0.84	2.47	0.51	4.7	0.993049	10.0375	38.3227	-0.36	-0.08	-0.29
0	NGT	NS31	1.10646	81	0	19.598	0	10.14	35	女	1.61	50.8	91	0.89011	112	68	26.8	3.37	7.59	6.89	5.95	3.98			29.15	1.73	3.88	1.3	2.73	0.21	4.9	0.521648	12.78	15.57	0.24	0.11	-0.68
0	NGT	NS45-0	9.49769	69	0	19.6462	0	13.55	27	女	1.55	47.2	89	0.775281	108	72	25.8	5.28	9.77	8.09	5.53	7.904	127.895	96.644	44.384	0.84	4.45	1.55	1.51	0.72	5	1.20048	15.0375	160.599	-0.08	0.19	-0.14
1	IGT	S056	21.2728	79	0	19.6506	0	6.56	27	女	1.53	46	88.5	0.892655	120	81	24.3	4.59	10.9	9.31	10.55	12.22			176.4	1.24	4.81	1.7	1.82	0.56	5.3	1.75439	18.855	91.255	0.09	0.23	-0.25
0	NGT	A15	8.76308	62	0	19.7885	0	11.3	25	女	158	49.4	89	0.696629	118	76		4.64	8.79	7.36	5.62	9.96	131.7	158.1	76	1.41	4.5	2.12	2.11	0.5	5.5	1.443	13.885	224.915	0.15	0.33	-0.3
1	IGT	S401	7.50312	71	0	19.8286	0	6.46	24	女	1.58	49.5	87	0.810345	103	63	27.8	5.34	10.55	12.48	7.99	13.95	152.3	316.2	390.6	0.33	1.94	1.08	0.62	0.39	5	2.09644	19.965	512.087	-0.48	0.03	-0.41
0	NGT	NS01-0	1.15696	69	0	19.8347	0	8.83	27	女	1.65	54	89	0.775281	108	58	22.5	4.73	4.87	3.98	3.65	7.24	16.59	15.24	6.22	0.84	3.74	1.16	2.07	0.67	5.2	1.06157	8.4275	24.645	-0.08	0.06	-0.17
0	NGT	NS35-0	6.05113	69	0	19.8543	0	12.53	27	女	1.55	47.7	90	0.766667	100	78	28.5	5.49	10.31	9.29	7.15	4.917	120.3	258.754	105.064	0.48	2.25	0.93	1.11	0.21	4.9	0.762195	17.07	307.977	-0.32	-0.03	-0.68
0	NGT	NS84-80	9.76405	72	0	19.9066	0	8.63	35	女	1.61	51.6	93	0.774194	107	72	24.6	4.03	4.12	4.3	3.19	4.108	77.956	38.245	8.561	1.37	3.16	0.96	1.88	0.88	5.21	0.574383	7.8875	72.9693	0.14	-0.02	-0.06
0	NGT	NS123	7.06295	78	0	19.91	0	10.09	25	女	1.52	46	89	0.876404	100	72	24.5	4.97			5.51	7.73			39.15	1.2	6.46	1.35	4.91	0.76	5.5	1.15207	3.9975	21.5075	0.08	0.13	-0.12
0	NGT	A18	7.76979	63	0	20	0	10.25	25	女	150	45	83	0.759036	106	72		4.9	9.59	9.42	6.4	16.29	104.1	104.6	76.52	0.66	4.11	1.71	2.48	0.75	4.9	2.36407	16.285	172.833	-0.18	0.23	-0.12
0	NGT	NS106-0	1.08089	69	0	20.0046	0	10.91	24	女	1.62	52.5	94	0.734043	118	63	22.7	4.43	6.21	4.82	7.56	7.299	48.87	39.957	24.294	0.68	3.79	1.07	2.29	0.71	5.4	1.04712	11.6075	68.3745	-0.17	0.03	-0.15
0	NGT	NS111-0	4.1486	70	0	20.0115	0	13.31	25	女	1.56	48.7	86	0.813953	114	70	27.2	4.41	5.82	5.46	5.62	7.142	32.385	31.662	19.478	1.38	6.28	1.01	4.88	0.56	5	1.02354	10.9175	51.4635	0.14	0	-0.25
0	NGT	A1	4.44082	64	0	20.0288	0	10.51	24	女	158	50	91	0.703297	110	67		4.64	6.8	6.02	4.97	6.07	81.68	92.93	43.82	0.6	3.61	1.7	2.07	0.55	4.7	0.887311	11.56	133.965	-0.22	0.23	-0.26
0	NGT	NS79-120	10.2978	70	0	20.0391	0	8.86	25	女	1.6	51.3	88	0.795455	120	70	24.3	4.91	7.36	6.32	6.21	7.834	54.323	45.321	23.555	0.92	3.45	1.22	1.75	0.41	5.3	1.16144	12.7525	74.8882	-0.04	0.09	-0.39
0	NGT	NS64-0	2.0762	66	0	20.0444	0	12.98	25	女	1.5	45.1	84	0.785714	106	77	25.3	5	6.3	7.6	4.9	6.564	148.852	39.83	66.181	0.53	3.56	1.22	1.92	0.7	5.2	0.982318	12.55	139.03	-0.28	0.09	-0.15
0	NGT	NS102-0	1.90755	70	0	20.113	0	8.81	25	女	1.54	47.7	88	0.795455	110	70	26.3	4.41	5.82	5.46	5.62	7.436	137.919	61.88	27.595	0.86	3.88	0.97	2.43	0.52	5.1	1.06496	10.9175	131.026	-0.07	-0.01	-0.28
0	NGT	NS111	3.76888	80	0	20.1517	0	10.31	27	女	1.64	54.2	92	0.869565	105	58	25.8	4.85			5.28	6.71			29.39	0.53	3.7	1.26	2.08	0.41	5	0.994036	3.8525	16.3725	-0.28	0.1	-0.39
0	NGT	NS21-0	1.07195	62	0	20.1632	0	7.14	28	女	1.53	47.2	88	0.704545	110	70	28	4	6.39	3.03	4.1	3.53	103.6	54.44	35.59	0.82	4.77	1.5	2.69	0.3	5	0.493097	8.5175	111.308	-0.09	0.18	-0.52
0	NGT	NS100-0	1.17887	70	0	20.1873	0	13	26	女	1.55	48.5	90	0.777778	126	90	24.4	4.38	5.77	4.49	4.84	6.242	116.707	78.765	34.753	1.28	6.24	1.09	4.56	0.57	5.4	0.894454	9.7675	136.364	0.11	0.04	-0.24
0	NGT	NS118	10.6122	68	0	20.2222	0	10.3	25	女	1.5	45.5	90	0.755556	91	51	26.6	4.3			4.42	4.24			121.7	0.37	3.37	1.23	1.77	0.29	5.3	0.606428	3.285	61.91	-0.43	0.09	-0.54
0	NGT	NS77-0	5.40888	68	0	20.2332	0	8.73	33	女	1.62	53.1	88	0.772727	100	50	25.9	4.68	9.59	6.59	7.33	8.31	38.81	39.118	20.598	1.15	4.21	1.5	2.34	0.58	5.5	1.21212	14.5725	61.12	0.06	0.18	-0.24
0	NGT	NS115	10.3851	78	0	20.2442	0	11.45	25	女	1.57	49.9	90	0.866667	106	58	26	4.16			7.03	8.19			85.88	0.76	4.12	1.61	2.18	0.92	4.9	1.14679	4.555	44.9875	-0.12	0.21	-0.04
0	NGT	NS038-0	5.23622	64	0	20.2692	0	11.77	26	女	1.58	50.6	89	0.719101	108	84	24.3	4.2	6.42	6.26	5.52	6.23	41.54	42.42	23.62	0.79	4.1	1.71	1.83	1.07	4.8	0.879507	11.715	65.9525	-0.1	0.23	0.03
0	NGT	NS85-0	1.15568	71	0	20.3125	0	8.76	35	女	1.6	52	92	0.771739	110	79	25.5	3.89	5.46	4.6	5.83	5.928	130.579	26.363	96.963	1.06	4.14	1.27	2.29	0.33	5.2	0.814996	10.0675	135.025	0.03	0.1	-0.48
2	IR	S395	7.39284	71	0	20.331	1	5.5	27	女	1.61	52.7	90	0.788889	123	68	27.8	5.15	8.67	7.97	6.5	16.21	138	146.1	185.8	3.45	4.4	1.22	2.43	0.69	5.4	2.39234	14.85	275.527	0.54	0.09	-0.16
1	IGT	S245	2.6042	71	0	20.3538	0	6.87	28	女	1.55	48.9	91	0.78022	110	78	25.4	5.48	10.86	12.75	10.55	13.48	72.23	105.9	134.8	1.32	4.43	1.21	2.81	0.42	5.4	2.04499	21.6375	186.31	0.12	0.08	-0.38
0	NGT	NS011-0	9.04125	68	0	20.3894	0	14.29	34	女	1.58	50.9	90.5	0.751381	100	68	28.3	4.42	10.97	6.74	4.86	4.98	21.54	10.23	5.24	0.74	1.96	0.51	1.13	0.21	5.3	0.717875	14.075	22.3075	-0.13	-0.29	-0.68
0	NGT	NS68-120	6.31132	72	0	20.4695	0	6.67	24	女	1.58	51.1	86	0.837209	109	74	27.7	3.77	6.18	5.54	4.63	7.924	75.404	40.754	70.632	0.57	3.03	0.92	1.76	0.35	5.3	1.07181	10.5025	105.564	-0.24	-0.04	-0.46
1	IGT	S402	8.84022	72	0	20.4695	0	7.28	27	女	1.58	51.1	89.5	0.804469	106	79	27.2	5.92	10.81	12.92	9.17	9.11	41.83	99.21	90.6	1.79	4.71	0.99	1.95	0.67	5.6	1.43062	21.16	142.9	0.25	0	-0.17
0	NGT	NS40-0	3.69274	63	0	20.482	0	6.85	27	女	1.42	41.3	74	0.851351	104	64	28.2	4.25	6.56	4.92	5.43	9.11	71.9	54.84	63.11	0.48	3.26	1.55	1.1	1.09	4.8	1.28205	10.7475	110.912	-0.32	0.19	0.04
0	NGT	NS67-120	7.39659	70	0	20.619	0	8.15	24	女	1.54	48.9	88	0.795455	120	84	26.7	3.78	7.34	7.02	6.99	6.549	54.773	45.49	74.547	0.78	2.93	0.88	1.61	0.28	5.4	0.88968	13.375	100.415	-0.11	-0.06	-0.55
0	NGT	NS82-0	7.20193	72	0	20.6452	0	8.01	25	女	1.55	49.6	86	0.837209	116	88	31.8	5.3	8.71	5.35	4.57	7.56	31.738	32.589	35.562	0.94	3	1.06	1.48	0.84	4.6	1.15075	11.9775	59.9817	-0.03	0.03	-0.08
0	NGT	NS75	12.7154	72	0	20.6452	0	8.01	32	女	1.55	49.6	82	0.878049	116	88	31.8	4.35		4.89	4.11	4.99	56.71	83.34	46.74	1.3	3.4	1.03	2.33	0.21	5.3	0.715308	6.81	115.478	0.11	0.01	-0.68
2	IR	S203	10.8914	69	0	20.6499	1	5.52	34	女	1.57	50.9	91	0.758242	120	78	28.3	4.96	6.33	6.57	5.94	8.25	96.12	99.46	94.14	0.91	4.21	1.29	2.38	0.45	5.3	1.22699	12.3025	171.787	-0.04	0.11	-0.35
0	NGT	0	7.12987	72	0	20.7098	0	10.29	28	女	1.58	51.7	83	0.86747	103	74	28.7	3.89	9	7.59	6.32	9.3	104.1	68.96	58.55	0.72	2.89	1.03	1.33	0.28	5.4	1.26743	14.325	135.37	-0.14	0.01	-0.55
0	NGT	NS019-0	6.35493	82	0	20.7554	0	9.54	24	女	1.61	53.8	95	0.863158	120	86	28.9	5.27	8.46	5.19	4.58	8.37	165.5	69.38	18.41	0.92	4.18	1.47	2.16	0.34	4.9	1.26904	11.73	146.083	-0.04	0.17	-0.47
0	NGT	NS63-0	3.27979	74	0	20.7761	0	11.57	24	女	1.63	55.2	92	0.804348	103	91	28.2	5.19	5.58	6.38	3.82	7.475	32.511	34.84	31.511	0.57	3.1	1.4	1.21	0.18	5.1	1.12994	10.7825	60.0097	-0.24	0.15	-0.74
0	NGT	A28	7.97847	64	0	20.8117	0	8.78	26	女	155	50	89	0.719101	113	60		4.92	7.81	6.44	6.34	7.3	57.92	56.45	76.15	0.94	3.69	0.55	2.17	0.39	5.3	1.0846	13.135	111.198	-0.03	-0.26	-0.41
0	NGT	NS61-0	1.12954	69	0	20.83	0	11.46	25	女	1.58	52	88	0.784091	120	80	28.5	4.89	6.27	3.49	4.25	7.117	88.763	33.051	18.952	0.51	3.53	1.15	2.07	0.16	5.3	1.05597	9.1	80.425	-0.29	0.06	-0.8
0	NGT	NS107-0	9.25934	71	0	20.8594	0	6.7	24	女	1.6	53.4	93	0.763441	100	80	33.2	4.41	6.35	4.79	4.76	6.417	97.548	36.4	22.547	0.89	5.69	1.62	3.57	0.67	5.3	0.92081	10.25	88.9518	-0.05	0.21	-0.17
1	IGT	A2	4.53841	69	0	21.1148	0	6.34	26	女	163	56.1	90	0.766667	98	59		5.04	8.61	8.03	8.04	6.6	63.43	80.36	79.51	0.76	4.21	1.7	2.48	0.88	6.3	0.990099	15.6075	133.39	-0.12	0.23	-0.06
1	IGT	S486	5.65638	82	0	21.1719	1	2.9	33	女	1.6	54.2	92	0.88587	123	79	28.9	4.66	8.47	11.03	8.82	16.6	93.43	167.2	282.7	4.26	6.95	1.8	5.47	0.41	5	2.36967	18.0825	317.615	0.63	0.26	-0.39
0	NGT	NS73-0	12.0202	60	0	21.1901	0	7.73	24	女	1.63	56.3	86	0.697674	100	60	29.3	4.48	8.03	5.38	4	6.807	130.46	89.969	13.347	2.5	5.3	1.18	3.49	0.91	5.4	0.981354	11.17	141.082	0.4	0.07	-0.04
0	NGT	NS70-0	0.958663	70	0	21.2671	0	10.91	35	女	1.64	57.2	94	0.744681	120	70	29.4	3.93	6.99	5.28	5.06	5.936	89.692	31.617	38.109	0.75	3.14	1.29	1.31	1.19	5	0.819001	10.9675	89.0973	-0.12	0.11	0.08
1	IGT	S372	1.03587	74	0	21.2891	1	5.05	31	女	1.6	54.5	91.5	0.803279	108	77	29.9	4.8	9.32	9.67	8.13	5.92	44.44	77.18	99.24	0.82	3.97	1.17	2.16	0.99	5.1	0.875657	17.1775	131.205	-0.09	0.07	0
2	IR	S260		70	0	21.299	1	4.27	30	女	1.57	52.5	94	0.744681	102	64	29.9	4.88	8.69	6.36	6.11	6.98	70.29	117.5	61.05	0.65	4.85	1.53	2.93	0.34	5.6	1.0352	13.39	155.54	-0.19	0.18	-0.47
0	NGT	NS031-120	6.05113	67	0	21.3166	0	8.06	32	女	1.53	49.9	94	0.712766	100	78	27.7	5	6.8	6	4.6	6.095	34.375	31.368	8.791	1.89	5.38	2.08	2.85	1.16	5	0.913242	11.45	46.6328	0.28	0.32	0.06
0	NGT	NS57-0	1.29962	72	0	21.3264	0	12.12	24	女	1.56	51.9	92	0.782609	112	84	29.7	4.04	7.75	8.01	5.33	9.308	88.926	65.94	116.238	0.71	3.91	1.18	2.25	0.76	5.3	1.287	13.5575	154.364	-0.15	0.07	-0.12
0	NGT	NS20-120	7.74267	75	0	21.3774	0	9.62	25	女	1.65	58.2	95	0.789474	119	86	30.4	5.2	9.32	6.36	5.25	8.94	79.99	80.56	56.96	0.56	2.91	0.96	1.62	0.44	5.2	1.34771	13.355	131.13	-0.25	-0.02	-0.36
2	IR	S286	1.09452	72	0	21.4453	1	5.13	26	女	1.6	54.9	93	0.774194	102	64	34.6	5.3	8.37	8.74	6.67	13.72	71.8	127.6	117.3	1.1	4.24	0.92	2.59	0.54	5.7	2.05761	15.4	193.68	0.04	-0.04	-0.27
2	IR	S118	9.56159	86	0	21.4912	1	5.06	33	女	1.63	57.1	97	0.886598	132	78	30.7	4.84	9.81	8.33	5.27	8.49	217.7	195.2	67.76	1.96	4.99	1.09	3.4	0.42	5.5	1.25156	14.9975	291.252	0.29	0.04	-0.38
2	IR	S246	5.80996	74	0	21.5065	1	5.49	19	女	1.68	60.7	100	0.74	118	64	31.1	5.83	10.99	7.19	7.17	13.94	244.9	159.4	118.4	1.97	4.74	1.25	2.62	0.84	5.2	2.15517	15.93	304.685	0.29	0.1	-0.08
1	IGT	S376	1.11329	72	0	21.5625	1	6.1	23	女	1.6	55.2	96	0.75	121	77	35.6	5.64	8.71	10.45	8.25	22.2	11.7	191.9	172.9	0.98	3.56	1.11	2.21	0.78	4.8	3.32226	17.7275	241.775	-0.01	0.05	-0.11
1	IGT	S399	8.52974	75	0	21.5729	0	10.69	27	女	1.53	50.5	86	0.872093	124	79	31.9	5.02	9.66	11.49	7.83	7	37.02	73.26	107.9	1.67	5.09	1.53	3.14	0.59	5.2	1.04822	18.6175	129.155	0.22	0.18	-0.23
1	IGT	S359	8.12742	77	0	21.6236	1	4.08	26	女	1.57	53.3	87	0.885057	103	78	31.3	5.06	10.38	9.83	9.19	24.99	265.9	241.1	298.2	4.78	4.75	0.94	2.36	1.24	5.5	3.59712	18.4225	469.123	0.68	-0.03	0.09
0	NGT	NS114	7.97461	80	0	21.6413	0	9.73	24	女	1.52	50	89	0.898876	103	64	27.7	5			7.6	11.19			95.67	1.88	5.19	0.91	3.56	0.75	4.8	1.65563	5.05	50.6325	0.27	-0.04	-0.12
0	NGT	NS96-0	0.853812	80	0	21.6931	0	9.54	24	女	1.67	60.5	93	0.860215	104	71	25.5	3.9	8	4.66	4.99	7.656	141.082	15.869	53.154	1.06	3.82	1.18	2.15	0.43	5.2	1.04932	10.965	110.934	0.03	0.07	-0.37
2	IR	S389	4.79983	72	0	21.7278	1	5.31	33	女	1.52	50.2	87.5	0.817143	101	69	31.9	5.26	9.63	10.26	7.42	10.96	143.2	226.3	284.8	1.53	5.67	1.28	3.79	0.77	5.2	1.65017	17.535	386.465	0.18	0.11	-0.11
0	NGT	NS110-0	1.08472	74	0	21.7453	0	12.94	25	女	1.57	53.6	94	0.787234	104	64	16.8	4.52	8.44	8.16	5	6.699	96.708	209.009	59.66	1.28	2.95	1.07	1.36	1.05	5	0.968992	13.97	236.615	0.11	0.03	0.02
2	IR	S296	1.1351	79	0	21.7914	1	5.12	30	女	1.58	54.4	91	0.868132	106	59	29.5	5.4	9.93	8.17	6.75	19.46	270	278.5	248.1	1.24	3.92	1.11	1.95	0.6	4.8	2.89855	15.8175	472.79	0.09	0.05	-0.22
0	NGT	NS23-0		78	0	21.7923	0	11.43	26	女	1.63	57.9	99	0.787879	112	71	29.5	5.07	6.89	6.08	4.7	9.4	42.363	58.624	23.673	1.31	3.74	0.87	2.58	0.37	5.3	1.40449	11.6225	79.336	0.12	-0.06	-0.43
1	IGT	S382	6.78711	73	0	21.795	1	5.77	27	女	1.59	55.1	89.5	0.815642	107	66	33.5	5.31	9.56	9.35	7.95	10.4	64.48	104.6	103.3	4.94	1.38	1.39	3.12	1.23	4.9	1.57233	17.095	164.94	0.69	0.14	0.09
0	NGT	0	8.45199	71	0	21.8359	0	13.32	28	女	1.6	55.9	85	0.835294	118	80	27.6	3.89	10	7.89	6.32	8.7	37.673	98.654	30.991	0.43	6.27	1.99	3.81	0.57	5	1.18765	15.05	110.498	-0.37	0.3	-0.24
1	IGT	S397	9.653	85	0	21.9116	1	4.39	27	女	1.58	54.7	91.5	0.928962	112	81	30.4	5.87	9.1	11.69	9.64	43.27	110.8	214.7	273.8	1.3	4.32	1.05	2.7	0.44	5.7	6.25	19.605	364.142	0.11	0.02	-0.36
0	NGT	NS27-0	1.16985	73	0	21.9146	0	9.14	25	女	1.53	51.3	91	0.802198	110	72	28.8	4.64	7.89	7.07	7	7.654	31.138	48.391	35.742	1.03	4.37	1.15	2.71	0.44	5.5	1.11483	13.9075	71.6467	0.01	0.06	-0.36
1	IGT	S300	11.398	89	0	22.0187	1	5.74	23	女	1.55	52.9	94.5	0.941799	122	81	32.3	4.56	5.57	5.64	8.16	30.63	198.9	156	141.8	2.38	4.04	1.06	2.12	0.31	5.5	4.20168	12.235	295.007	0.38	0.03	-0.51
0	NGT	NS43-0	1.07918	77	0	22.112	0	6.86	30	女	1.65	60.2	97	0.793814	110	78	30	5.37	8.41	6.8	7.33	14.61	109.1	67.05	82.16	0.81	4.27	1.18	2.63	0.19	5	2.19298	14.3125	149.57	-0.09	0.07	-0.72
0	NGT	NS101-0	2.17242	71	0	22.171	0	6.3	28	女	1.53	51.9	91	0.78022	111	71	31.1	4.48	9.07	7.33	6.58	9.865	82.23	107.308	71.428	1.26	3.38	1.48	0.96	0.65	5.3	1.41243	14.4425	159.776	0.1	0.17	-0.19
0	NGT	NS66-0	13.5975	77	0	22.1828	0	8.63	34	女	1.61	57.5	92	0.836957	120	81	27.8	4.25	7.33	5.39	4.53	5.973	113.242	16.058	11.776	0.59	3.09	1.75	0.73	0.27	5.1	0.847458	11.035	76.0457	-0.23	0.24	-0.57
0	NGT	ns89-120'	7.01001	70	0	22.1906	0	11.1	24	女	1.59	56.1	91	0.769231	119	67	32.1	4.67	5.95	3.74	3.72	6.493	71.606	25.665	6.082	1.52	4.27	0.99	2.65	0.48	5	0.95057	8.8075	59.716	0.18	0	-0.32
0	NGT	NS112	8.35113	78	0	22.2266	0	10.57	28	女	1.6	56.9	92	0.847826	128	76	31.3	5.41			5.09	10.29			61.77	0.7	4.06	1	1.69	0.69	4.8	1.56495	3.8975	33.4575	-0.15	0	-0.16
1	IGT	S427	22.0131	73	0	22.2685	1	4.1	28	女	1.55	53.5	89	0.820225	115	86	31.8	5.57	11.45	9.56	8.33	9.59	106.4	109.7	129.6	1.53	5.63	1.55	3.23	0.96	5.4	1.47493	18.4525	202.673	0.18	0.19	-0.02
1	IGT	S374	3.48607	83	0	22.3101	1	6.01	27	女	1.55	53.6	93	0.887097	112	76	31.5	5.87	11.23	13.05	9.47	10.38	129	121.1	129.5	1.8	4.53	1.17	2.74	0.84	5.8	1.62075	21.605	222.67	0.26	0.07	-0.08
2	IR	S481	8.3297	87	0	22.3324	1	5.46	26	女	1.65	60.8	99	0.878788	120	68	32.8	4.28	8.23	7.02	6.47	9.93	164	120.2	108	1	4.83	1.26	2.36	0.37	5.2	1.3986	13.685	228.632	0	0.1	-0.43
1	IGT	S370	1.09708	81	0	22.4569	1	4.62	34	女	1.64	60.4	93	0.865591	105	65	32	5.51	9.76	9.14	8.22	15.35	93.5	84.74	98.91	1.14	5.02	1.41	3.23	0.99	4.9	2.32019	17.2225	163.597	0.06	0.15	0
0	NGT	NS122	8.27102	71	0	22.4698	0	7.59	24	女	1.63	59.7	93	0.763441	100	60	26.5	4.54			5.3	7.27			38.02	0.53	3.25	1.43	1.61	0.32	4.9	1.05152	3.785	20.8275	-0.28	0.16	-0.49
1	IGT	W288	8.94171	90	0	22.5537	0	6.31	34	女	167	62.9	96.5	0.935751	136	81	30.4	6.55	10.79	7.3	8.33	8.53	37.22	32.96	36.67	1.7	3.15	1.18	1.64	0.55	6.4	1.38504	16.6725	63.7975	0.23	0.07	-0.26
1	IGT	S178	8.49169	88	0	22.6847	1	3.9	29	女	1.55	54.5	94	0.93617	120	70	33.1	4.98	9.32	10.1	8.06	15.7	152.5	235.2	223.2	2.03	1.18	0.98	3.31	0.56	5.6	2.29358	17.51	368.175	0.31	-0.01	-0.25
0	NGT	NS121	8.48877	75	0	22.7127	0	10.49	24	女	1.58	56.7	96	0.78125	109	61	23.9	5.18			6.8	12.16			75.99	0.77	3.55	1.25	1.85	0.75	5	1.81488	4.695	41.035	-0.11	0.1	-0.12
2	IR	S479	6.62253	90	0	22.7646	1	4.68	28	女	1.56	55.4	94	0.957447	118	76	33.5	4.67	9.06	6.1	6.75	7.85	121.6	81.28	90.06	1.12	5.14	1.33	2.63	0.67	4.7	1.14548	13.6475	168.752	0.05	0.12	-0.17
1	IGT	S220	2.92971	70	0	22.8329	1	3.79	30	女	1.58	57	89	0.786517	120	65	34.1	5.41	10.11	10.2	8.72	15.5	161.8	224.4	339.5	1.5	4.96	1.06	3.19	0.53	5.5	2.331	18.4175	422.825	0.18	0.03	-0.28
2	IR	S276	1.26007	82	0	22.8462	1	5.67	31	女	1.63	60.7	93	0.88172	102	68	33.1	5.18	8.75	7.48	6.56	13.63	91.92	177	85.72	1.03	4.24	1.44	2.46	0.36	5.1	2.0284	14.56	224.977	0.01	0.16	-0.44
0	NGT	A27	10.4576	70	0	22.8889	0	10.33	26	女	150	51.5	85	0.823529	110	66		4.79	7.54	5.63	5.93	10.55	123.9	83.7	131.2	0.84	4.45	1.46	3.08	0.77	5.6	1.54083	12.155	192.963	-0.08	0.16	-0.11
0	NGT	A5	8.01011	78	0	22.8988	0	9.62	23	女	166	63.1	98	0.795918	96	66		5.3	7.87	4.89	7.03	9.87	64.07	9.39	57.45	0.83	3.67	1.24	2.25	0.66	5.3	1.49477	12.4425	70.27	-0.08	0.09	-0.18
2	IR	S294	11.7357	80	0	22.9826	1	4.57	29	女	1.53	53.8	92	0.869565	115	60	34.2	5.32	6.73	6.32	3.83	6.43	146.6	43.05	16.51	0.69	4.41	1.08	2.84	0.66	5.3	0.982318	11.35	115.45	-0.16	0.03	-0.18
1	IGT	S309	4.61598	85	0	23.072	1	2.98	34	女	1.63	61.3	96	0.885417	112	64	32.9	5.97	9.73	10.37	7.95	21.55	189.7	204.8	188.9	2.95	4.57	0.87	2.35	0.41	5.5	3.28947	18.11	348.288	0.47	-0.06	-0.39
0	NGT	NS26-0	6.26945	81	0	23.1274	0	8.45	28	女	1.67	64.5	97	0.835052	116	78	29.5	5	7.8	7.1	5.6	6.095	34.375	31.368	8.791	1.61	4.52	1.34	2.3	0.38	5.2	0.913242	13.275	46.6328	0.21	0.13	-0.42
1	IGT	S475	8.77043	82	0	23.2389	1	3.42	25	女	1.53	54.4	93	0.88172	115	83	33.1	5.22	9.17	10.03	7.97	6.2	83.31	120.7	147.7	1.15	4.33	1.3	2.44	0.88	6	0.942507	17.3975	207.58	0.06	0.11	-0.06
1	IGT	S362	1.14667	79	0	23.2981	1	5.3	30	女	1.59	58.9	93	0.844086	104	64	30.9	5.65	9.62	9.81	7.88	24.09	139.1	146.1	137.9	0.65	3.86	1.49	1.91	0.6	5.7	3.59712	17.52	254.097	-0.19	0.17	-0.22
1	IGT	S471	8.62681	89	0	23.3203	0	7.2	27	女	1.6	59.7	97	0.917526	102	64	35.6	4.68	8.11	9.4	8.85	8.93	36.41	61.73	88.54	1.56	4.72	1.28	2.37	0.46	4.9	1.30039	16.7	111.005	0.19	0.11	-0.34
1	IGT	S256	4.453	85	0	23.4552	1	4.24	31	女	1.68	66.2	97	0.876289	110	75	34.8	5.06	12.55	11.49	9.06	29.92	268.8	235.4	262.7	2.46	6.03	1.31	3.82	0.41	5.5	4.25532	20.6875	449.78	0.39	0.12	-0.39
1	IGT	S367	8.73792	82	0	23.472	1	2.27	26	女	1.62	61.6	95	0.863158	154	48	34.8	5.35	11.19	10.15	8.05	9.44	109.6	176.8	140.4	4.23	1.43	1.36	2.31	0.99	5.4	1.43472	18.57	259.96	0.63	0.13	0
1	IGT	S291	20.0263	81	0	23.4738	1	5.78	35	女	1.58	58.6	94	0.861702	147	101	36.6	6.02	8.38	8.81	8.28	26.24	122.5	145.6	147.2	1.94	5.15	1.19	3.05	0.5	5.2	3.96825	16.4425	250.61	0.29	0.08	-0.3
2	IR	S473	6.64259	84	0	23.5172	1	3.27	24	女	1.55	56.5	98	0.857143	105	70	35.2	4.93	5.18	6.84	6.69	13.25	80.13	71.85	118.5	1.09	3.88	1.15	1.99	0.55	5.6	1.94175	12.2975	156.515	0.04	0.06	-0.26
0	NGT	NS017	1.03799	87	0	23.5482	0	10.25	28	女	1.62	61.8	98	0.887755	112	68	37.5	4.46	8.45	5.69	6.08	8.54	103.9	52.26	72.43	0.78	2.99	0.82	1.61	0.48	4.9	1.22399	12.6475	129.495	-0.11	-0.09	-0.32
2	IR	S263		79	0	23.5588	1	4.81	22	女	1.55	56.6	94	0.840426	112	85	34.6	4.74	8.79	8.14	6.23	8.41	74.06	82.16	74.77	0.99	3.74	1.08	2.32	0.37	5.1	1.23153	14.8	138.137	0	0.03	-0.43
2	IR	S415	5.12395	83	0	23.5716	1	4.95	39	女	1.61	61.1	94.5	0.873016	130	72	34.4	4.95	9.28	7.69	6.32	11.02	93.8	96.67	90.79	1.29	4.6	1.33	2.86	0.48	5.3	1.62602	14.805	167.553	0.11	0.12	-0.32
2	IR	S334	11.5127	77	0	23.6	1	5.11	28	女	1.5	53.1	89	0.865169	99	66	31.8	5.5	8.91	11.18	7.41	13.89	55.54	104	155.4	1.31	5.08	1.09	3.38		5.7	2.10526	17.92	186.942	0.12	0.04
1	IGT	S238	5.4793	81	0	23.6004	1	3.98	33	女	1.55	56.7	92	0.880435	122	68	32.7	5.45	9.88	9.76	9.68	23.45	293.4	249.1	456.8	3.69	4.68	1.13	2.72	0.28	5.3	3.46021	18.4625	567.788	0.57	0.05	-0.55
2	IR	S271	1.10604	81	0	23.7282	1	5.57	28	女	1.65	64.6	101	0.80198	110	80	34.9	4.89	7.78	7.56	7.03	12.03	105.5	129	120.9	0.73	4.08	1.33	2.07	0.5	5.3	1.76367	14.2975	212.958	-0.14	0.12	-0.3
2	IR	S203		87	0	23.7891	1	5.94	29	女	1.6	60.9	99	0.878788	120	63	36.5	4.9	9.37	9.59	7.23	5.96	70.71	75.95	78.09	0.97	4.91	1.02	3.53	0.41	5.3	0.887311	16.7175	132.852	-0.01	0.01	-0.39
0	NGT	NS60-0		75	0	23.8281	0	10.93	30	女	1.6	61	89	0.842697	102	70	36.8	4.61	6.06	4.91	4.89	14.232	84.778	19.61	25.012	0.82	3.21	0.93	1.87	0.31	4.9	2.03666	10.31	73.1605	-0.09	-0.03	-0.51
1	IGT	S483	5.62084	88	0	23.8624	1	3.89	22	女	1.63	63.4	96	0.916667	111	77	34.8	5.54	9.9	10.03	9.45	19.47	270.3	232.1	335.1	0.93	3.68	0.79	2.38	0.5	5.2	2.91545	18.5825	481.642	-0.03	-0.1	-0.3
2	IR	S422	9.05487	78	0	23.9545	1	4.07	27	女	1.58	59.8	93	0.83871	116	87	30.8	5.75	8.62	6.86	6.51	18.5	201.6	150.8	118.9	2.19	5.05	1.12	2.97	0.41	5.6	2.8169	14.1475	277.975	0.34	0.05	-0.39
2	IR	S326	1.13382	86	1	24.1259	1	4.74	30	女	1.63	64.1	100.5	0.850746	107	76	34.5	5.68	9.74	9.22	7.21	24.63	152.3	169.5	124.1	1.7	3.9	0.82	2.44	0.59	4.9	3.67647	16.81	271.483	0.23	-0.09	-0.23
2	IR	S369	9.25934	83	1	24.1259	1	3.98	28	女	1.63	64.1	98	0.846939	112	73	34.6	5.22	9.51	7.12	6.21	6.79	11.15	118.8	92.99	4.42	1.26	1.23	2.73	0.48	5.5	1.02987	14.505	142.868	0.65	0.09	-0.32
1	IGT	S418	3.86182	70	1	24.1415	1	6.04	27	女	1.55	58	90	0.777778	132	91	35	5.17	10.5	10.13	8.42	11.4	94.04	103.2	149.3	1.71	5.54	1.42	3.63	0.43	5.1	1.70358	18.35	201.92	0.23	0.15	-0.37
2	IR	S349	8.81085	78	1	24.3111	1	3.33	26	女	1.5	54.7	91.5	0.852459	106	73	33.8	5.46	9.12	10.76	6.74	29.65	169	361.3	272.4	3.4	3.74	0.87	2.02			4.329	17.365	499.087	0.53	-0.06
1	IGT	S433	3.77941	84	1	24.3359	1	3.28	31	女	1.6	62.3	96	0.875	122	66	36.8	5.39	8.42	9.73	7.98	22.17	180.7	235.2	250.5	2.97	6.05	1.15	4.02	0.81	5.3	3.27869	16.845	397.543	0.47	0.06	-0.09
1	IGT	IR40	9.93554	79	1	24.3717	1	3.05	24	女	1.54	57.8	91.5	0.862295	127	82	35.7	5.11	8.67	10.7	8.71	24.02	161.8	315.2	334.3	1.48	4.15	0.92	3.06	0.4	5.5	3.47222	17.9925	490.455	0.17	-0.04	-0.4
2	IR	S338	12.5094	85	1	24.3823	1	4.77	23	女	1.57	60.1	94.5	0.899471	101	64	36.6	5.38	9.83	10.35	6.14	45.41	355.6	683.9	174.4	1.78	4.42	0.91	3.27	0.31	5.1	6.36943	17.0925	789.278	0.25	-0.04	-0.51
1	IGT	S466	7.95163	90	1	24.3923	1	3.77	30	女	1.53	57.1	95	0.947368	108	59	32.9	5.08	7.58	9.34	8.31	13.51	73.15	113.3	193.9	1.23	4.22	1.25	2.34	0.41	5.7	2	16.22	221.877	0.09	0.1	-0.39
2	IR	S489	8.90448	80	1	24.4261	1	2.99	25	女	1.65	66.5	99	0.808081	107	66	31.4	5.19	11.73	7.77	5.24	15.94	242.9	247.8	67.59	1.16	3.75	1.17	1.52	0.33	5.3	2.35849	15.61	345.08	0.06	0.07	-0.48
0	NGT	NS90-0	1.0894	74	1	24.6548	0	7.3	26	女	1.56	60	88	0.840909	114	70	30.4	3.91	9.01	7.84	5.07	8.174	105.368	123.39	91.151	0.64	3.13	0.75	2.2	0.71	5	1.11982	13.8975	192.845	-0.19	-0.12	-0.15
2	IR	S250	1.11458	78	1	24.7111	1	4.07	22	女	1.5	55.6	91	0.857143	118	68	33.8	5.76	9.98	10.69	5.32	18.42	132.4	286.4	134.4	0.69	3.55	1.02	2.1	0.64	5	2.80112	17.1075	352.805	-0.16	0.01	-0.19
1	IGT	S455	6.96932	79	1	24.8803	1	4.34	32	女	1.59	62.9	93	0.849462	106	58	36.3	5.19	8.35	9.64	9.28	14.95	63.95	89.37	115.4	1.22	4.55	1.71	2.29	0.77	5.4	2.21729	17.3425	160.44	0.09	0.23	-0.11
0	NGT	NS55-0	0.893354	74	1	24.996	0	9.73	25	女	1.58	62.4	90	0.822222	112	78	28.9	4.68	7	4.82	4.73	9.777	118.718	56.622	12.531	0.45	3.31	1.51	1.42	0.22	4.9	1.42045	10.65	110.535	-0.35	0.18	-0.66
2	IR	S451	6.95954	89	1	25	1	4.15	29	女	1.6	64	96	0.927083	125	81	38.5	5.35	9.27	9.62	6.11	22.3	149.7	211.9	136.8	1.33	4.47	1.24	2.64	0.53	5.7	3.28947	16.2425	307.75	0.12	0.09	-0.28
2	IR	S478	2.87648	90	1	25.0761	1	4.31	28	女	1.58	62.6	98.5	0.913706	112	69	36.7	5.25	8.08	7.82	6.04	22.35	160.8	250.6	90.04	1.28	4.49	1.07	2.39	0.81	5	3.26797	14.2375	318.957	0.11	0.03	-0.09
1	IGT	S449	6.97387	78	1	25.0995	1	4.24	33	女	1.67	70	96	0.8125	120	75	36.5	5.26	8.68	8.78	8.07	13.94	191.2	183.4	175	2.24	4.71	1.2	2.52	0.61	5.6	2.08333	16.275	324.135	0.35	0.08	-0.21
2	IR	S432	12.0745	80	1	25.189	1	4.74	25	女	1.56	61.3	100	0.8	113	73	37	5.46	10.42	9.16	7.64	20.68	131	166.6	267.3	1.13	4.32	1.22	2.65	0.52	5	3.07692	17.265	329.27	0.05	0.09	-0.28
2	IR	S431	1.18576	76	1	25.1953	1	4	27	女	1.6	64.5	96.5	0.787565	109	76	34.4	4.8	6.7	8.66	7.66	7.76	37.54	70.26	102.3	1	4.57	1.17	2.62	0.77	5.2	1.14286	14.875	124.555	0	0.07	-0.11
1	IGT	S335	9.56159	87	1	25.2248	1	4.37	29	女	1.62	66.2	98	0.882653	98	62	38.5	5.84	8.61	9.24	8.32	24.85	84	126.7	129	1.5	4.43	1.3	2.7	0.87	5.2	3.74532	16.855	207.738	0.18	0.11	-0.06
1	IGT	S017	12.2266	83	1	25.2363	1	5.27	23	女	1.58	63	95	0.868421	145	75	36.2	4.65	9.5	11.6	10.51	21.52	115.4	176.2	301.9	0.98	4.71	1.3	2.87	0.67	5.3	3.0303	19.8675	346.18	-0.01	0.11	-0.17
0	NGT	NS72-0	1.06217	78	1	25.2889	0	7.6	24	女	1.5	56.9	93	0.83871	122	73	37.2	4.44	8.28	6.84	5.66	9.945	221.308	395.795	181.096	0.63	4.61	1.76	2.32	0.35	5.6	1.41844	13.21	500.534	-0.2	0.25	-0.46
0	NGT	NS41-0	6.43205	86	1	25.2941	0	6.3	28	女	1.7	73.1	102	0.843137	110	72	37.8	4.54	6.37	5.21	4.63	13.17	193.1	79.65	72.31	0.51	2.88	0.72	1.86	0.46	5.4	1.8797	10.5425	195.735	-0.29	-0.14	-0.34
2	IR	S257	12.5978	79	1	25.3837	1	3.41	25	女	1.54	60.2	93	0.849462	106	64	34.8	5.67	10.46	10.15	7.56	13	88.63	160.99	107.14	1.93	3.35	0.77	1.71	0.43	5.5	1.99601	18.04	221.877	0.29	-0.11	-0.37
1	IGT	S270	1.2501	81	1	25.3941	1	4.37	35	女	1.64	68.3	105	0.771429	104	76	36.1	5.99	10.58	8.91	8	21.81	126.7	142.4	114.6	1.33	5.18	1.48	2.84	0.44	5.8	3.33333	17.47	232.903	0.12	0.17	-0.36
1	IGT	S409	12.8525	80	1	25.3946	1	4	32	女	1.59	64.2	96.5	0.829016	130	89	35.4	5.46	9.78	10.73	9.14	37.47	118.2	170.3	177.2	1.04	3.93	0.99	2.87	0.64	5.3	5.37634	18.8725	284.793	0.02	0	-0.19
2	IR	S459	10.5763	82	1	25.5568	1	4.36	30	女	1.58	63.8	89	0.921348	115	63	35.2	5.39	8.32	7.53	6.7	18.91	142.4	154.1	129	1.44	5.37	1.44	3.07	0.33	5.7	2.8169	14.505	256.002	0.16	0.16	-0.48
0	NGT	ns22-80'	3.59656	84	1	25.6	0	7.11	30	女	1.5	57.6	97	0.865979	110	70	31.7	4.55	4.67	4.68	5.4	9.214	12.107	11.826	8.097	2.98	4.04	0.95	2.25	0.59	5	1.32802	9.6825	21.275	0.47	-0.02	-0.23
2	IR	S428	1.1501	83	1	25.6015	1	4.18	26	女	1.67	71.4	100	0.825	119	76	35.4	6.23	10.31	10.99	7.55	21.74	142.7	164.3	96.77	1.67	3.32	1.03	1.6	1.15	5.7	3.367	18.73	248.395	0.22	0.01	0.06
1	IGT	S414	5.73782	85	1	25.6382	1	3.21	27	女	1.65	69.8	96	0.880208	140	83	37.4	5.59	7.84	9.66	8.68	43.38	149.6	304.6	412.6	2.08	5.54	1.24	4.2	0.47	5.2	6.17284	16.9025	520.395	0.32	0.09	-0.33
2	IR	S365	1.08046	88	1	25.6641	1	3.04	18	女	1.6	65.7	98.5	0.893401	106	61	37.1	5.22	8.74	9.7	5.29	23.07	72.4	89.48	29.08	1.71	4.56	1.25	2.78		5.4	3.367	15.595	123.618	0.23	0.1
0	NGT	NS33-0	3.07377	80	1	25.7819	0	6.96	31	女	1.63	68.5	100	0.8	123	79	45	4.75	8.48	5	5.79	18.61	120.8	48.51	87.99	0.6	3.95	1.32	2.45	0.76	5.6	2.65957	12.0725	145.43	-0.22	0.12	-0.12
1	IGT	S149	12.9021	83	1	25.7971	1	2.92	28	女	1.58	64.4	90	0.922222	112	78	44.7	3.57	9.9	10.03	10.36	23.37	139.1	158.2	319.9	1.09	5.38	2.06	0.36	0.52	5.8	2.99401	18.545	353.993	0.04	0.31	-0.28
2	IR	S226	1.34938	84	1	25.8222	1	5.45	30	女	1.5	58.1	90.5	0.928177	135	70	36.7	5.57	10.35	7.81	6.18	9.79	122.6	186	64.85	1.15	4.62	1.17	2.73	0.7	5.5	1.50602	15.515	235.673	0.06	0.07	-0.15
2	IR	S476	6.862	91	1	25.9287	1	4.71	30	女	1.56	63.1	97	0.93299	102	67	38.3	5.29	10.03	8.14	6.11	18.62	410.1	167.6	162.8	2.26	4.47	1.05	2.59	0.5	5	2.75482	15.4975	416.805	0.35	0.02	-0.3
2	IR	S317	10.0316	87	1	25.9375	1	5.58	34	女	1.6	66.4	97	0.896907	113	75	38	5.54	9.33	7.84	7.29	9.4	85.75	72.72	131.3	0.69	5.47	1.58	3.32	0.2	5.2	1.44509	15.575	165.415	-0.16	0.2	-0.7
1	IGT	S225	6.21277	88	1	26.0156	1	4.5	29	女	1.6	66.6	103	0.854369	100	72	38.9	5.8	9.73	10.47	8.26	11.74	72.42	94.26	111.2	1.62	5.8	1.68	3.76	0.49	5.4	1.82149	18.2975	165.44	0.21	0.23	-0.31
1	IGT	S275	5.02578	87	1	26.0562	1	5.21	23	女	1.55	62.6	97.5	0.892308	116	72	37.9	5	9.98	11.05	8.03	13.83	81.19	142.4	107.6	1.48	3.66	0.86	2.06	0.59	5.4	2.03252	18.5425	204.653	0.17	-0.07	-0.23
1	IGT	S268	19.1876	84	1	26.2252	1	2.81	29	女	1.59	66.3	96	0.875	102	64	35	5.35	8.77	10.4	9.1	17.31	117.8	152.7	228.6	1.53	4.3	0.99	2.57	0.78	5.6	2.57732	18.0725	292.053	0.18	0	-0.11
1	IGT	S346	10.5832	87	1	26.2643	1	3.52	28	女	1.55	63.1	97.5	0.892308	113	71	38.4	5.07	10.24	10.02	8.22	15.74	152.8	137.8	132.5	3.06	4.73	1.13	2.77	0.53	5.3	2.31481	18.0125	249.935	0.49	0.05	-0.28
0	NGT	NS025	1.1086	93	1	26.2891	0	6.3	29	女	1.6	67.3	102	0.911765	120	80	34.4	3.46	6.95	6.8	4.76	9.73	62.97	72.05	52.16	0.86	3.87	1.04	1.25	0.21	5.1	1.27065	11.82	114.035	-0.07	0.02	-0.68
1	IGT	S228	6.84058	90	1	26.3251	1	3.65	26	女	1.68	74.3	104	0.865385	115	73	42.1	5.38	10.89	10.49	8.28	27.07	156.82	214.85	221.9	2.19	4.86	1.18	3.23	0.53	6	3.95257	18.7975	357.265	0.34	0.07	-0.28
2	IR	S053	8.54138	87	1	26.3835	1	3.66	24	女	1.59	66.7	104	0.836538	115	79	40.2	5.35	7.74	6.21	4.38	18.23	83.09	58.96	27.32	0.89	3.81	1.02	1.93	0.33	5	2.71003	12.055	103.983	-0.05	0.01	-0.48
0	NGT	NS69-120	5.94276	79	1	26.6384	0	9.59	30	女	1.58	66.5	101	0.782178	120	88	36.6	4.28	5.65	5.96	5.48	4.977	60.435	39.962	38.007	3.09	4.28	1.46	2.29	0.65	5	0.70922	11.105	80.4368	0.49	0.16	-0.19
2	IR	S364	6.63803	88	1	26.6603	1	3.34	28	女	1.59	67.4	97.5	0.902564	125	85	35.7	5.44	7.6	5.31	6.28	34.16	350.8	360.2	157.2	3.51	4.44	0.86	3.08	0.74	5.5	4.92611	12.2825	532.69	0.55	-0.07	-0.13
1	IGT	S279	15.8922	92	1	26.7	1	2.74	14	女	1.65	72.7	100	0.92	98	64	38.7	5.57	9.33	9	8.84	34.25	407.7	431.4	411.2	1.12	3.73	1.19	1.98	0.56	5.6	4.97512	17.2275	741.562	0.05	0.08	-0.25
2	IR	S412	9.92441	80	1	26.7981	1	4.19	25	女	1.63	71.2	101	0.787129	122	68	36	5.68	9.44	7.42	6.13	20.03	225	183.8	163.2	2.54	3.81	0.89	2.78	0.44	5.6	3.02115	14.77	336.957	0.4	-0.05	-0.36
2	IR	S283	7.20193	84	1	26.8	1	4.24	26	女	1.6	68.7	105	0.795238	126	88	39	5.38	10.5	10.72	7.65	23.67	125.5	200.5	113.8	3.23	4	0.79	2.22	1.08	5.5	3.48432	18.46	275.942	0.51	-0.1	0.03
1	IGT	S445	11.3964	88	1	26.8054	1	3.72	28	女	1.55	64.4	96	0.916667	120	93	28	5.27	9.49	11.11	8.03	35.3	265.4	425.8	364.8	2.29	5.71	1.19	3.28	0.78	5.8	5.02513	18.41	643.275	0.36	0.08	-0.11
2	IR	S198	6.16002	92	1	26.8165	1	4.31	33	女	1.57	66.1	97	0.948454	112	68	38	5.32	7.37	9.18	7.49		335.9	555.5	360.1	3.06	3.8	0.8	2.2	0.71	5.4		15.645	764.625	0.49	-0.1	-0.15
1	IGT	S337	1.0677	79	1	26.8252	1	3.13	23	女	1.62	70.4	104	0.759615	100	71	41.2	5.62	11.27	11.41	10.12	18.64	104.6	121.3	177.9	1.56	5.43	1.9	2.62	0.87	5.6	2.8169	20.6575	236.885	0.19	0.28	-0.06
1	IGT	S485	5.62084	97	1	26.8386	1	5.01	30	女	1.58	67	101	0.960396	136	91	38.1	5.26	8.06	10.34	10.15	11.27	80.15	172.2	228.4	1.59	4.45	1.28	2.51	0.56	5.5	1.69492	18.175	286.243	0.2	0.11	-0.25
2	IR	S157	5.99202	89	1	26.9531	1	5.72	21	女	1.6	69	84	1.05952	120	70	39	5.17	8.41	8.33	6.21	3.42	12.64	87.25	47.65	0.74	4.47	16.2	2.78	0.55	5.7	0.521648	14.85	96.4375	-0.13	1.21	-0.26
1	IGT	S423	6.60826	85	1	27.0135	1	2.48	27	女	1.55	64.9	97	0.876289	149	69	36.5	5.71	10.78	11.9	10.52	23.04	147.4	241.4	286.2	1.49	6.02	1.26	4.6	1.24	6.2	3.46021	21.0025	403.61	0.17	0.1	0.09
1	IGT	S404	8.11527	88	1	27.0792	1	4.4	25	女	1.56	65.9	98	0.892857	110	85	40.3	5.48	9.51	9.21	8.15	12.31	144.7	243.4	205.7	2.06	5.87	1.42	4.22	0.81	5.3	1.87266	17.1075	360.827	0.31	0.15	-0.09
2	IR	NS104-0	10.1449	93	1	27.1075	1	5.86	28	女	1.67	75.6	104	0.894231	120	80	38.1	4.03	7.47	6.11	6.98	21.809	524.326	251.771	19.23	0.66	3.45	1.52	1.49	0.39	4.9	2.92398	12.815	466.058	-0.18	0.18	-0.41
2	IR	S474	7.27812	90	1	27.1442	1	4.32	25	女	1.65	73.9	106	0.849057	103	72	40.2	5.23	9.29	6.05	5.9	30.69	567	150.2	131.7	1.01	4.54	1.07	2.68	0.41	5.3	4.40529	13.44	469.673	0	0.03	-0.39
1	IGT	S254	4.5081	89	1	27.2392	1	2.75	29	女	1.58	68	100	0.89	104	78	34.1	5.74	11.46	12.41	10.71	17.68	131.7	147.5	213.6	9.29	5.33	0.89	1.13	0.5	6	2.69542	21.8275	287.695	0.97	-0.05	-0.3
2	IR	S410	10.9277	79	1	27.3438	1	5.89	19	女	1.6	70	101.5	0.778325	130	73	40.5	5.14	9.87	8.79	5.85	38.95	415.2	524.6	383.1	0.91	4.17	1.16	2.55	0.6	5.8	5.46448	15.7375	802.337	-0.04	0.06	-0.22
1	IGT	S008	7.70085	89	1	27.4	0	6.29	29	女	1.57	67.6	100	0.89	116	75	40.2	4.56	9.01	10.81	9.37	20.39	181.2	197.5	285.7	1.49	4.7	1.03	3.28	0.44	5.7	2.86533	18.4375	386.673	0.17	0.01	-0.36
2	IR	S360	6.84058	88	1	27.4219	1	5.71	23	女	1.6	70.2	100	0.88	123	86	38.1	5.03	9.48	7.63	4.94	13.42	44.24	49.43	17.08	1.72	4.35	1.18	2.63	0.39	5.5	1.9802	14.19	71.0875	0.24	0.07	-0.41
2	IR	S222	3.95182	88	1	27.4222	1	4.81	29	女	1.5	61.7	96	0.916667	121	67	43.4	5.82	9.15	7.39	5.22	30.5	191.1	167.3	61.5	3.1	5.78	1.02	4.04	0.46	5.6	4.52489	14.1825	259.4	0.49	0.01	-0.34
2	IR	S444	5.60455	83	1	27.4253	1	4.38	31	女	1.53	64.2	94.5	0.873016	121	78	39.4	5.57	10.13	8.83	6.93	18.39	146.4	147.4	143.6	1.79	3.91	0.85	2.24	0.78	5.4	2.77008	16.545	260.147	0.25	-0.07	-0.11
1	IGT	S439	8.99993	89	1	27.439	1	2.54	24	女	1.64	73.8	99.5	0.889447	136	90	40.1	4.56	9.81	10.06	8.81	22.7	127	149	192	2.07	4.62	1.15	2.95	0.95	5.3	3.1746	17.995	276.925	0.32	0.06	-0.02
1	IGT	S267	2.50964	96	1	27.5115	1	3.28	27	女	1.65	74.9	106	0.90566	112	76	36.5	5.5	10.78	11.09	7.88	51.55	805.1	1010		1.97	4.66	1.04	3.25	0.68	5	7.19424	19.0225	1172.94	0.29	0.02	-0.17
2	IR	S470	7.68701	93	1	27.5509	1	3.2	25	女	1.63	73.2	102	0.911765	127	77	40.2	5.9	9.91	9.95	6.46	35.46	155.6	209.4	179.4	0.97	4.38	1.16	2.84	0.88	5.5	5.2356	17.1225	333.415	-0.01	0.06	-0.06
1	IGT	S153	6.71802	86	1	27.5546	1	5.48	26	女	1.55	66.2	95	0.905263	110	80	36.8	6.1	11.03	11.01	8.85	23.18	122.9	176.4	167.2	1.31	4.96	1.01	3.38	0.43	5.5	3.5461	19.7225	283.145	0.12	0	-0.37
1	IGT	S353	10.35	89	1	27.5781	1	2.13	30	女	1.6	70.6	100.5	0.880597	112	80	37.6	6.18	10.91	12.79	10.49	46.43	220.1	375.1	489.9	2.08	4.92	1.28	2.85	0.29	5.9	6.75676	21.8375	647.933	0.32	0.11	-0.54
1	IGT	S487	10.1348	95	1	27.5963	1	2.46	25	女	1.55	66.3	103.5	0.913043	114	76	38.5	5.15	11.25	13.86	10.75	30.66	246.8	472.1	438.1	1.3	4.71	1.05	2.77	0.58	5.5	4.36681	22.6825	704.19	0.11	0.02	-0.24
2	IR	S477	14.5185	102	1	27.6172	1	4.81	25	女	1.6	70.7	104	0.975962	124	86	41.1	5.12	6.31	6.99	7.04	12	42.62	69.28	63.94	1.43	5.7	1.29	3.16	0.59	5.1	1.78571	13.1975	108.24	0.16	0.11	-0.23
1	IGT	S350	9.65747	84	1	27.7211	1	3.84	26	女	1.55	66.6	99	0.848485	94	69	37.8	5.18	9.27	10.03	8.28	15.99	98.31	120.7	121.3	1.08	3.47	1.18	1.92	0.53	5.8	2.36407	17.5925	204.327	0.03	0.07	-0.28
2	IR	S421	9.52181	90	1	27.76	1	4.31	34	女	1.58	69.3	99	0.909091	112	83	42.1	4.64	8.23	8.04	7.23	21.28	221.5	150.3	194.5	1.65	4.38	1.33	2.4	0.47	5.4	3.003	14.92	326.045	0.22	0.12	-0.33
1	IGT	S464	7.97461	95	1	27.8	1	2.97	30	女	1.58	69.4	98	0.969388	108	73	39.1	5.39	8.39	10.69	9.9	18.79	54.88	102.1	116.5	1.89	4.89	1.3	3.06	0.65	6.2	2.80112	18.51	166.963	0.28	0.11	-0.19
2	IR	S407	7.84343	84	1	27.8144	1	5.96	30	女	1.63	73.9	102	0.823529	129	86	39	5	8.53	7.72	5.51	23.85	181.7	203.8	126.8	1.09	3.52	1	2.11	0.34	5.8	3.42466	14.06	313.062	0.04	0	-0.47
1	IGT	S368	10.4693	95	1	27.9202	1	2.97	31	女	1.58	69.7	103.5	0.917874	117	75	39.4	5.15	10.16	8.11	9.35	16.01	140.5	76.41	160.1	2.01	5.01	1.2	3.15	0.33	5.1	2.36407	17.125	211.61	0.3	0.08	-0.48
1	IGT	S278	6.529	89	1	28	1	2.99	30	女	1.55	67.2	103	0.864078	100	58	40.7	5.83	11.5	12.88	10.41	20.3	89.26	167	234.7	1.08	4.64	0.87	3.14	0.79	5.4	3.08642	22.0725	292.305	0.03	-0.06	-0.1
2	IR	S347	5.83493	86	1	28	1	5.5	28	女	1.5	63	100	0.86	131	97	40.8	5.57	10.55	10.96	7.5	8.66	50.21	78.91	89.62	2.73	6.62	1.77	3.7	0.48	5.7	1.33511	18.6375	131.262	0.44	0.25	-0.32
1	IGT	S211	6.263	92	1	28.0742	1	4.08	21	女	1.57	69.2	100	0.92	121	62	50.4	4.75	8.82	9.69	9.03	15.41	177.8	179.9	204.8	1.84	5.99	1.03	4.28	0.45	5.5	2.21729	17.38	330.077	0.26	0.01	-0.35
1	IGT	S358	7.95547	91	1	28.1853	1	2.93	30	女	1.69	80.5	105	0.866667	145	98	37.5	4.93	8.8	9.3	8.36	16.94	273.2	261.3	283.6	1.73	3.59	0.92	2.23	0.59	5.4	2.46305	16.7875	478.61	0.24	-0.04	-0.23
2	IR	S417	9.27613	80	1	28.2797	1	3.56	26	女	1.53	66.2	97	0.824742	124	67	37.9	5.38	7.72	6.36	6.34	19.21	131.1	73.4	67.75	1.54	4.05	1.16	2.31	0.34	5.4	2.85714	13.145	159.278	0.19	0.06	-0.47
2	IR	S272	4.11073	88	1	28.3092	1	3.5	26	女	1.68	79.9	106	0.830189			41.7	5	7.22	5.14	5.6	18.28	246.8	111	90.28	1.71	3.67	0.91	2.32		4.7	2.65957	11.515	256.36	0.23	-0.04
1	IGT	S290	9.49663	94	1	28.3984	1	3.01	24	女	1.6	72.7	98	0.959184	120	79	40.7	5.35	9.21	9.21	7.82	26.72	198.5	249.7	257.5	9.27	6.4	0.84	1.15	0.6	4.4	3.89105	16.76	421.955	0.97	-0.08	-0.22
1	IGT	S288	2.67028	93	1	28.441	0	7.03	30	女	1.58	71	102	0.911765	113	79	39.1	5.71	10.67	9.84	9.24	24.83	121.9	147.8	191.6	1.97	4.58	0.84	3.12	0.5	6.1	3.71747	18.7625	273.808	0.29	-0.08	-0.3
2	IR	S333	6.48131	81	1	28.6719	1	3.56	36	女	1.6	73.4	97.5	0.830769	153	109	38.6	5.45	8.85	10.49	7.3	30.64	106.6	231.7	206.8	1.83	4.11	0.88	2.77	0.35	5.2	4.44444	17.305	338.135	0.26	-0.06	-0.46
1	IGT	S394	8.20805	96	1	28.699	1	2.51	25	女	1.68	81	106	0.90566	133	96	41.8	6.28	11.89	11.9	10.35	30.41	171.2	215.6	303	1.75	5.5	0.95	4.19	0.53	6.1	4.62963	21.615	406.402	0.24	-0.02	-0.28
2	IR	S57-12	6.80061	90	1	28.7496	1	3.83	30	女	1.53	67.3	103	0.868932	114	73	42.7	4.58	7.23	8.27	6.78	25.79	135.3	255.3	173.9	1.7	4.73	1.33	2.63	0.53	5.1	3.58423	14.3525	352.522	0.23	0.12	-0.28
2	IR	S453	6.56722	82	1	28.7614	1	4.84	29	女	1.58	71.8	99	0.828283	111	68	39.4	4.76	8.36	5.24	5.16	21.52	278.2	122.2	86.93	1.05	4.35	1.52	2.24	0.59	5.7	3.0581	11.88	279.595	0.02	0.18	-0.23
2	IR	S221	5.09491	82	1	28.8447	1	3.56	22	女	1.62	75.7	102	0.803922	120	70	43.1	5.63	9.47	9.44	5.82	17.94	99.57	129.2	99.32	2.98	4.83	0.97	1.99	0.45	4.7	2.71739	16.1325	200.83	0.47	-0.01	-0.35
2	IR	S457	4.04994	87	1	28.9333	1	4.65	22	女	1.5	65.1	100	0.87	119	79	41.9	5.29	8.51	7.5	7.07		337	388.8	404.5	3.38	4.34	1.1	1.76	0.25	5.5		14.7375	662.35	0.53	0.04	-0.6
2	IR	S119	10.8671	98	1	28.9965	1	3.55	18	女	1.7	83.8	107	0.915888	98	70	41.9	4.15	7.71	7.16	5.18	20.6	256.8	181.5	99.75	1.11	3.28	0.98	1.82	0.32	5.6	2.80112	12.8525	319.55	0.05	-0.01	-0.49
2	IR	S463	9.78047	99	1	29.0887	1	2.86	28	女	1.68	82.1	108	0.916667	118	63	41.6	4.97	8.77	9.17	5.53	38.76	439.2	909.1	227.1	1.57	5.1	1.31	2.69	0.66	5.4	5.37634	15.27	1024.66	0.2	0.12	-0.18
2	IR	S154	8.26744	95	1	29.1797	1	5.31	28	女	1.6	74.7	104	0.913462	110	68	42	5.15	9.25	8.5	6.64	17.92	153	142.3	450.2	1.31	3.68	0.89	2.29	0.38	5.5	2.63158	15.6075	412.805	0.12	-0.05	-0.42
1	IGT	S293	11.1422	90	1	29.1865	1	2.15	27	女	1.64	78.5	104.5	0.861244	115	80	41.8	5.29	8.9	8.82	7.96	25	220.8	234.8	304.8	1.82	5.2	1.05	3.68	0.51	4.7	3.64964	16.3675	445.15	0.26	0.02	-0.29
1	IGT	S434	9.9852	95	1	29.207	1	3.07	28	女	1.63	77.6	106	0.896226	123	80	41.8	5.08	9.27	11.75	9.26	24.93	149.7	240.4	216.7	1.35	4.4	1.11	2.63	0.75	5.7	3.58423	19.3475	369.733	0.13	0.05	-0.12
1	IGT	S314	9.02844	97	1	29.3359	1	3.07	29	女	1.6	75.1	100	0.965	109	73	42.9	5.03	11.54	13.5	8.08	35.16	287.5	739.2	492.9	1.2	4.14	0.78	2.6	0.49	5.2	4.92611	21.1925	953.39	0.08	-0.11	-0.31
2	IR	S398	10.2256	90	1	29.3778	1	3.41	28	女	1.5	66.1	99.5	0.899497	101	82	43.8	5.79	10.2	8.26	7.71	39.45	286.8	371.6	329.9	2.52	5.92	1.25	3.83	0.31	5.9	5.71429	16.5975	596.913	0.4	0.1	-0.51
1	IGT	S420	10.3051	89	1	29.3803	1	4.09	33	女	1.56	71.5	107	0.831776	143	88	42.9	4.97	7.58	9.44	7.82	15.27	107.6	176.3	129.2	2.46	5.7	1.1	3.64	0.72	5.7	2.23214	16.0225	254.442	0.39	0.04	-0.14
1	IGT	S273	20.2267	95	1	29.5684	1	2.83	29	女	1.65	80.5	100	0.95	103	74	43.3	5.59	9.47	8.51	8	18.28	218.7	220.2	248.7	1.13	3.71	0.81	2.55	0.38	6.2	2.75482	16.515	403.42	0.05	-0.09	-0.42
1	IGT	S292	12.9623	92	1	29.6827	1	2.77	26	女	1.58	74.1	104	0.884615	129	82	42	5.73	8.91	10.59	9.18	31.81	76.49	124.9	112.8	1.84	3.62	1.3	1.68	0.56	4.9	4.6729	18.42	196.273	0.26	0.11	-0.25
0	NGT	NS014-0	1.09622	91	1	29.7333	0	7.72	30	女	1.5	66.9	102	0.892157	100	62	47.3	5.2	9.02	6.86	6.25	8.94	79.99	80.56	56.96	1.57	4.72	1.44	2.91	0.38	5.1	1.34771	14.08	131.13	0.2	0.16	-0.42
1	IGT	S210	1.19652	92	1	29.9757	1	4.62	20	女	1.61	77.7	107	0.859813	128	78	53.8	5.89	10.32	11.94	9.32	17.54	88.84	163.4	213.7	1.38	5.16	1.3	3	0.27	6	2.69542	20.2475	278.205	0.14	0.11	-0.57
1	IGT	S058	7.46812	93	1	30.2652	1	4.56	22	女	1.47	65.4	101	0.920792	106	69	39.8	5.7	9.57	10.25	8.97	44.65	303.5	449.8	450.6	6.63	4.75	1.2	1.92	0.66	5.3	6.36943	18.3825	725.562	0.82	0.08	-0.18
2	IR	S413	12.6439	91	1	30.2663	1	3.73	27	女	1.65	82.4	106	0.858491	109	87	41.9	6.79	11.56	11.65	7.29		251.6	391.2	309	2.58	4.46	0.87	2.81	0.19	6.2		19.86	573.7	0.41	-0.06	-0.72
1	IGT	S289	12.5786	103	1	30.3785	1	2.03	24	女	1.59	76.8	100	1.03	125	76	44.5	5.09	10.9	9.87	9.58	55.53	671.5	924.1		1.89	6.22	1.17	4.54	0.41	6	7.46269	18.915	1042.71	0.28	0.07	-0.39
2	IR	S469	10.8764	103	1	30.4438	1	1.53	32	女	1.58	76	103	0.995146	123	83	41.4	5.15	7.5	9.25	5.62	48.46	262.3	490.8	261.9	2.17	4.7	1.05	2.78	0.46	5.8	6.66667	14.785	642.315	0.34	0.02	-0.34
1	IGT	S268	8.11119	105	1	30.5515	1	4.03	24	女	1.55	73.4	107	0.981308	125	70	43.7	5.12	10.48	9.64	9.29	22.83	386.4	364.3	459.2	1.08	3.82	0.87	2.38	0.24	5.8	3.31126	18.395	701.732	0.03	-0.06	-0.62
1	IGT	S454	7.02952	95	1	30.8444	1	4.37	31	女	1.58	77	110	0.863636	119	65	44.8	5.49	8.62	8.78	7.97	17.53	54.33	81.48	72.2	2.32	5.01	1.5	2.68	0.44	5.8	2.63158	16.2525	128.757	0.37	0.18	-0.36
1	IGT	S447	3.1549	96	1	30.9245	1	2.94	24	女	1.58	77.2	102	0.941176	112	77	43.7	5.5	7.71	9.44	8.12	49.76	222.2	331	446.1	1.57	3.6	0.8	2.09	0.91	5.9	6.94444	16.37	594.84	0.2	-0.1	-0.04
2	IR	S355	9.72482	93	1	31.1641	1	2.13	23	女	1.63	82.8	109	0.848624	118	86	44.5	5.26	8.91	10.11	6.51	38.15	115.3	241.2	105.7	0.97	3.24	0.9	2.24		5.2	5.37634	16.6075	300.938	-0.01	-0.05
2	IR	S277	0.992758	95	1	31.2394	1	4.32	17	女	1.63	83	113	0.840708	100	68	43.7	5.11	8.85	6.87	6.23	47.43	462.4	491.2	309.2	1.26	4.16	0.8	2.8		5.4	6.49351	13.97	766.058	0.1	-0.1
1	IGT	S450	21.8507	95	1	31.25	1	2.99	32	女	1.6	80	105	0.904762	117	86	44.6	5.39	9.95	10.01	8.69	39.12	252.3	316.2	498.4	1.18	4.28	1.46	2.11	0.52	5.9	5.55556	18.175	622.28	0.07	0.16	-0.28
1	IGT	S240	3.91923	107	1	31.2728	1	3.08	26	女	1.48	68.5	104	1.02885	122	68	47.2	6.17	11.77	10.8	10.1	56.67	492.5	534.1		2.5	5.03	1.09	3.04	0.35	6	8.06452	20.5775	660.992	0.4	0.04	-0.46
2	IR	S332	10.1777	94	1	31.5556	1	3.7	23	女	1.5	71	102.5	0.917073	99	74	41.8	5.43	9.2	7.26	7.53	19.91	162.2	115.1	183.3	3.04	3.93	0.83	2.1	0.37	5.7	2.96736	15.1675	264.053	0.48	-0.08	-0.43
1	IGT	S441	4.28475	95	1	32.0794	1	3.46	27	女	1.59	81.1	106	0.891509	112	72	46.2	5	9.19	12.03	9.36	14.68	78.1	161.6	159	1.18	3.88	1.52	2.05	0.99	5.5	2.15517	19.5475	243.42	0.07	0.18	0
1	IGT	S488	12.9651	107	1	32.1609	1	1.58	21	女	1.64	86.5	119	0.89916	105	66	44	5.71	9.64	9.21	8.73	43.6	268.1	358	258.6	1.5	5.78	1.24	3.38	0.58	5.3	6.25	17.52	542.75	0.18	0.09	-0.24
1	IGT	S408	11.425	91	1	32.5078	1	3.86	27	女	1.55	78.1	113	0.800885	109	74	45.3	4.99	8.35	9.92	8.23	19.26	131.4	215.5	367.8	1.18	4.36	1.04	3.08	0.5	5.4	2.7933	16.9775	416.04	0.07	0.02	-0.3
1	IGT	S007	7.51499	88	1	32.7	1	4.32	31	女	1.55	78.6	105.5	0.834123	139	91	32.8	5.71	10.37	11.65	8.87	26.66	152.2	163.6	242.5	2.06	4.22	0.78	2.9	0.31	5.8	3.96825	19.785	326.715	0.31	-0.11	-0.51
1	IGT	S299	11.7762	104	1	32.8208	1	2.9	33	女	1.57	80.9	106	0.976415	126	75	35.4	5.69	12.75	15.14	9.35	22.9	74.15	128.1	115.2	2.39	6.44	1.1	4.62	0.9	6.1	3.43643	23.8275	196.475	0.38	0.04	-0.05
2	IR	S242	6.78412	103	1	33.008	1	2.67	32	女	1.61	85.6	107.5	0.95814	115	68	45.2	5.61	8.32	7.75	6.05	29.42	303.9	384.2	150.9	2.4	5.74	1.01	3.7	0.42	5.6	4.329	14.4	522.905	0.38	0	-0.38
2	IR	S448	5.05801	97	1	33.1213	1	4.07	29	女	1.63	88	110	0.881818	116	74	45.3	5.39	9.06	9.63	7.51	45.32	284.7	421.3	276.4	1.9	4.35	1	2.72	0.36	5.3	6.36943	16.855	607.855	0.28	0	-0.44
2	IR	S438	1.19437	90	1	33.2479	1	4.18	34	女	1.58	83	111.5	0.802691	132	89	44.6	5.25	10.43	10.51	7.75	16.3	131.4	180.1	160.8	1.52	3.49	0.94	1.64	0.77	5.5	2.42131	18.285	285.25	0.18	-0.03	-0.11
1	IGT	S201	3.41976	93	1	33.59	1	2.81	33	女	1.55	80.7	109	0.853211	121	63	55	5.39	12.08	14.55	10.42	27.6	263.4	432.6	474.6	2.23	6.39	1.26	4.48	0.7	5.5	4.03226	23.51	700.35	0.35	0.1	-0.15
1	IGT	S405	11.3911	102	1	33.6719	1	3.22	21	女	1.6	86.2	112	0.90625	120	85	45	5.97	10.79	8.68	7.96	28.29	204.7	144.4	150.8	1.54	4.94	1.14	3.47	0.32	5.8	4.25532	17.3775	293.123	0.19	0.06	-0.49
2	IR	S324	13.1964	103	1	33.9887	1	4.02	30	女	1.62	89.2	115	0.895652	137	88	46.9	4.9	8.27	6.47	5.17	25.41	117	159	112.2	2.42	4.71	0.95	3.11	0.47	4.9	3.61011	12.7975	240.202	0.38	-0.02	-0.33
2	IR	S460	8.25958	102	1	34.1426	1	5.11	36	女	1.49	75.8	104	0.980769	155	91	46.3	5.11	9.05	9.8	6.37	16.78	146.9	261.9	221.8	1.68	4.71	1.36	2.86	0.59	5.9	2.46914	16.3375	384.97	0.23	0.13	-0.23
1	IGT	S458	7.46808	94	1	34.8577	1	3.31	21	女	1.65	94.9	114	0.824561	111	69	48.6	5	9.94	8.48	8.3	31.47	159.1	137.4	130.2	0.77	3.44	0.91	2.01	0.46	5.8	4.44444	16.73	255.567	-0.11	-0.04	-0.34
2	IR	S252	1.28265	99	1	35.0505	1	3.01	32	女	1.58	87.5	106	0.933962	124	74	51.1	6.11	9.56	8.83	6.24		122.3	146.4	117.6	1.81	4.82	1.28	2.7	0.92	5.8		16.05	229.75	0.26	0.11	-0.04
1	IGT	S462	5.69197	105	1	35.1538	1	2.77	29	女	1.63	93.4	110	0.954545	121	71	48	5.08	9.04	10.99	9.4	35.02	193.8	299.1	218.6	2.62	3.38	1.11	1.55	0.63	5.6	4.92611	18.7325	439.28	0.42	0.05	-0.2
1	IGT	S264	21.6058	102	1	35.1538	1	4.99	35	女	1.63	93.4	113	0.902655	130	80	44.5	6.22	10.89	13.27	8.9	33.21	199.6	510.8	421.7	1.62	4.99	0.86	3.47	0.47	6.3	5	21.4025	702.053	0.21	-0.07	-0.33
0	NGT	A29	4.87752	61			0	10.39	24	女	160	43.4	80	0.7625	106	65		4.9	8.56	8.59	7.2	8.41	78.58	102.6	84.5	1.13	4.09	2.05	1.9	0.49	5.3	1.24533	15.5475	160.593	0.05	0.31	-0.31
0	NGT	A17	5.40932	62			0	10.95	24	女	167	47.3	87	0.712644	98	61		4.96	8.6	8.75	7.58	7.73	48.54	65.73	69.65	0.75	2.98	1.55	1.41	0.52	5	1.15075	15.8925	110.325	-0.12	0.19	-0.28
0	NGT	NS39-0	8.50026	60			0	9.33	28	女	1.57	41.4	83	0.722892	102	66	20.5	4.52	7.25	6.55	5.45	5.94	84.52	89.89	52.48	0.8	3.93	1.2	2.35	0.76	5.2	0.860585	12.3925	137.403	-0.1	0.08	-0.12
1	IGT	S53-12	4.52954	100			1	5.68	26	女	1.5	80.9	114	0.877193	100	60	50.9	4.72	8.68	8.69	7.98	32.9	150.9	165.9	214.1	2.75	4.45	1.05	2.44	0.57	5	4.54545	16.0275	315.15	0.44	0.02	-0.24
2	IR	S232	5.64476	105			1	5.84	26	女	1.61	101.3	125	0.84	110	70	56.9	4.96	9.28	7.79	6.38	14.56	139.9	139.8	80.56	1.38	3.78	0.89	2.57	0.54	5.6	2.1322	14.9125	218.72	0.14	-0.05	-0.27
2	IR	S116-v	5.66838	107			1	2.58	24	女	1.51	82.3	112	0.955357	134	88	55.2	5.1	9.09	9.07	7.29	32.77	251.7	308.5	311.5	1.1	5.54	1.4	3.26	0.26	5.7	4.62963	16.2675	521.168	0.04	0.15	-0.59
2	IR	S234	7.06235				1	3.25	18	女	1.63	120.4	134	0.985075	118	71		7.52	13.59	13.56	6.46		254.2	332.5	142.9	0.79	4.73	1.06	3.39	0.68	6.8		22.075	447.925	-0.1	0.03	-0.17

## Sheet: Treatment
Group	Number	WC1	WC2	WC3	Age	Height	Weight	BMI(v1)	BMI(v2)	BMI(v3)	fat1	fat2	fat3	HC	WHR1	WHR2	WHR3	SBP1	SBP2	SBP3	DBP1	DBP2	DBP3	M1	M2	M3	M2 change	M3 change	Blood glucose 1	Blood glucose 2	Blood glucose 3	GIR1	GIR2	GIR3	ogtt0min1	HOMA2-IR	ogtt0min2	ogtt0min3	ogtt30min1	ogtt30min2	ogtt30min3	ogtt60min1	ogtt60min2	ogtt60min3	ogtt120min1	ogtt120min2	ogtt120min3	AUCg(mmol *h/l)v1	AUCgv2
1	S319	93.5	95	83	29	1.57	77.7	31.5226	29.1695	28.0336	44.6	40.8	39.1	102.5	0.912195	0.979381	0.892473	105	116	127	75	92	79	2.46	3.86	3.62	-1.4	-1.16	4.2±0.1	5.0±0.1	4.8±0.2	59.2	75.2±1.6	63.2±1.1	4.88	0.727802	5.14	4.78	8.81	8.33	8	11.05	10.11	10	10.8	8.64	9.5	19.3125	17.3525
1	S438	89.5	81	84	34	1.58	83	33.2479	30.0833	30.0833	44.6	41.2	41	111.5	0.802691	0.786408	0.777778	132	120	118	89	87	79	4.19	8.24	5.51	-4.05	-1.32	5.2±0.2	4.8±0.2	5.0±0.2	89.2±42.2	189±5.5	117±2.2	5.25	0.801282	5.05	5.14	10.43	7.66	8.63	10.51	6.14	8.17	7.75	5.61	6.53	18.285	12.5025
1	S194	80	86	86	34	1.51	58.5	25.6568	25.9695	26.9725	26.3	38.4	43.7	85	0.941176	0.934783	0.891192	113	100	120	60	72	85	3.75	2.92	4.35	0.83	-0.6	5.2±0.2	5.0±0.1	5.5±0.1	70±3.8	50	88±2	4.86	0.723589	5.82	5.28	7.67	10.15	8.56	6.93	9.84	8.74	5.78	9.73	8.74	13.1375	18.775
1	S240	107	89.7	90	26	1.48	68.5	31.2728	27.3923	26.8444	47.2	37.8	37.7	104	1.02885	0.937304	0.9375	122	108	121	68	62	68	3.08	3.65	3.57	-0.57	-0.49	5.3±0.1	4.9±0.1	5.0±0.2	58.6±3.5	60	62	6.17	0.98912	5.55	5.61	11.77	8.94	8.46	10.8	7.11	6.88	10.1	6.82	6.64	20.5775	14.6
1	S225	88	77	80	29	1.6	66.6	26.0156	24.2188	23.5547	38.9	28.3	32.5	103	0.854369	0.762376	0.816327	100	104	102	72	58	68	4.5	8.62	4.57	-4.12	-0.07	5.2±0.1	4.8±0.1	4.9±0.1	90	153.8±0.4	88.2±2	5.8	0.912409	5.11	5.11	9.73	7.21	7.21	10.47	7	7	8.26	5.8	5.8	18.2975	13.0325
1	S264	102	90	89	35	1.63	93.4	35.1538	30.7878	28.8682	44.5	30.8	32.6	113	0.902655	0.857143	0.855769	130	112	110	80	72	87	3.02	3.74	4.4	-0.72	-1.38	4.7±0.1	4.9±0.2	4.7±0.1	76.4±4.5	83.8±1.6	99±8.9	6.22	1	5.02	5.03	10.89	8.95	9.36	13.27	9.97	10.16	8.9	6.38	8.88	21.4025	16.3975
1	S201	93	96	95	33	1.55	80.7	33.59	32.8408	32.1332	55	43.2	42.5	109	0.853211	0.888889	0.88785	121	104	101	63	64	68	2.81	2.78	3.09	0.03	-0.28	4.8±0.1	4.8±0.1	4.8±0.1	66.6±3.6	65.8±2.2	71.6±1.7	5.39	0.829187	5.26	5.16	12.08	10.41	10.46	14.55	13.22	12.18	10.42	11.56	9.01	23.51	22.215
1	S236	86	86	91	27	1.58	71.4	28.6012	27.2392	27.7199	32.3	32.3	37.2	96	0.895833	0.895833	0.91	131	131	100	67	67	70	3.44	4.06	4.29	-0.62	-0.85	5.0±0.2	5.1±0.2	5.3±0.2	77.8±0.4	75±2	80.2±1.8	5.09	0.769231	5.5	5.5	8.35	9.93	9.93	6.27	9.78	9.78	7.27	7.82	7.82	13.785	17.585
1	S338	85	85	83.5	23	1.57	60.1	24.3823	23.0732	21.9116	36.6	33	32.6	94.5	0.899471	0.949721	0.917582	101	86	96	64	59	64	4.81	3.55	7.24	1.26	-2.43	4.9±0.1	4.8±0.1	4.8±0.1	87.2±5.2	65.0±14.6	121±2.2	5.38	0.82713	5.74	5.15	9.83	10.16	9.74	10.35	6.77	8.64	6.14	7.73	4.62	17.0925	15.4575
1	S337	79	79	76	23	1.62	70.4	26.8252	23.9293	22.0622	41.2	35.4	34.1	104	0.759615	0.822917	0.817204	100	109	107	71	75	94	3.13	6.95	7.14	-3.82	-4.01	5.1±0.1	4.7±0.1	5.2±0.2	58.4±0.9	129±13.5	120.2±6.8	5.62	0.875657	5.23	5.16	11.27	10.36	10.19	11.41	10.1	9.85	10.12	8.57	6.98	20.6575	18.3475
1	S454v3	95	104	100	31	1.58	77	30.8444	29.8029	29.843	44.8	43.3	43.7	110	0.863636	0.928571	0.884956	119	103	103	65	71	67	4.37	4.99	3.59	-0.62	0.78	4.9±0.3	5.1±0.3	4.9±0.2	118±18.9	116±6.5	73.2±2.2	5.49	0.849618	4.98	5.61	8.62	7.35	9.16	8.78	8.91	11	7.97	5.66	12.32	16.2525	14.4325
1	S350	84	89	78.5	26	1.55	66.6	27.7211	26.2643	25.5983	37.8	36	34.3	99	0.848485	0.912821	0.830688	94	117	128	69	73	61	3.84	4.02	5.31	-0.18	-1.47	5.1±0.2	5±0.2	4.9±0.1	71.2±1.1	68.8±1.1	90±10	5.18	0.787402	5.13	4.91	9.27	10.52	8.39	10.03	9.17	8.23	8.28	7.81	5.42	17.5925	17.325
1	S415	82.5	78	77.5	39	1.61	61.1	23.5716	22.1442	21.7198	34.4	32.3	31.6	94.5	0.873016	0.847826	0.861111	130	102	125	72	94	66	5.06	8.57	5.39	-3.51	-0.33	5.2±0.1	5.1±0.2	5.1±0.2	89.6±3.6	150.4±6.8	86±2.2	4.95	0.74129	4.75	5.2	9.28	8.5	6.76	7.69	9.88	8.3	6.32	6.31	6.94	14.805	16.0025
1	S432	80	77	72	25	1.56	61.3	25.189	22.5181	20.0115	37	34.3	29	100	0.8	0.846154	0.847059	113	114	106	73	72	59	4.76	6.44	11.19	-1.68	-6.43	5±0.2	4.9±0.1	5.30±0.2	80.8±6.2	101±10.8	170±25.7	5.46	0.84317	4.64	4.98	10.42	8.05	7.68	9.16	6.63	7.97	7.64	5.15	5.08	17.265	12.7325
1	S385	80.5	73.5	71.5	27	1.6	65.9	25.7422	23.75	22.8125	35.9	33.5	30.4	99	0.813131	0.773684	0.794444	116	116	91	74	64	65	3.51	3.91	6.1	-0.4	-2.59	5.1±0.1	5.1±0.2	5.3	73.4±2.2	75.8±5.4	106.4±5.0	5.32	0.814996	5.45	4.39	8.54	9.06	7.81	8.32	8.92	8.46	6.18	5.46	6.1	14.93	15.3125
1	S388	88	91.5	84.5	35	1.58	68.2	27.3193	29.1219	27.3995	38.2	39.4	36.7	93.5	0.941176	0.847222	0.828431	110	130	113	87	94	74	4.28	3.27	3.71	1.01	0.57	5±0.2	5.0±0.1	4.8±0.2	83.6±4.2	70.4±0.9	68.8±13	5.43	0.837521	5.24	4.94	7.69	8.62	8.96	9.13	8.17	10.06	8.21	6.86	10.04	16.155	15.1775
1	S380	96	84	89	24	1.6	71.6	27.9688	26.9141	27.5	40.3	38.4	39.3	106.5	0.901408	0.792453	0.847619	114	110	119	71	70	75	3.56	7.12	5.76	-3.56	-2.2	4.8±0.2	4.8±0.2	5.0±0.2	87.8±7.3	143.4±16.5	114.8±7.5	4.54	0.661376	4.75	4.6	7.28	5.73	6.76	7.29	5.77	7.03	6.99	5.23	5.85	13.7375	10.995
1	S449v3	78	80	84	33	1.67	70	25.0995	22.6254	21.5065	36.5	32.3	27.4	96	0.8125	0.851064	0.923077	120	113	104	75	75	67	4.24	3.93	6.17	0.31	-1.93	5.1±0.2	5.2±0.1	4.8±0.2	84±6.5	77.6±1.3	106.4±13.2	5.26	0.803213	5.03	4.89	8.68	7.28	7.44	8.78	7.21	6.5	8.07	5.31	5.51	16.275	12.96
1	S307	84	81	80.5	21	1.68	76.1	26.9629	23.6678	22.0734	38	31.8	29.3	102	0.823529	0.870968	0.884615	133	97	123	92	64	86	3.48	4.72	4.72	-1.24	-1.24	5.3±0.1	5.1±0.1	5.1±0.1	74.2±0.4	88.2±5.3	88.2±5.3	5.36	0.823045	5.36	5.85	9.61	9.61	11.25	8.61	8.61	8.8	7.03	7.03	6.98	16.1175	16.1175
1	S222	88	86	77	29	1.5	61.7	27.4222	24.9333	23.5556	43.4	33.5	30.6	96	0.916667	0.945055	0.855556	121	120	103	67	78	63	4.84	6.05	6.73	-1.21	-1.89	4.6	4.9±0.1	4.7±0.2	89.6±4.9	96	107±7.6	5.82	0.91659	5.2	5.22	9.15	6.76	6.91	7.39	6.17	6.26	5.22	5.04	4.82	14.1825	11.8275
1	S368	95	87	75.5	31	1.58	69.7	27.9202	25.4366	24.315	39.4	36.3	33.5	103.5	0.917874	0.887755	0.790576	117	103	106	75	75	75	2.97	5.67	8.08	-2.7	-5.11	5±0.2	4.8±0.1	4.8±0.1	54.2±1.1	110	142.6±9.9	5.15	0.78125	5.07	4.69	10.16	10.49	9.23	8.11	13.44	7.55	9.35	12.28	6.28	17.125	22.7325
1	S439	88.5	85	92	24	1.64	73.8	27.439	27.0672	25.58	40.1	39.8	37	99.5	0.889447	0.894737	0.93401	136	128	143	90	86	90	2.54	4.98	3.68	-2.44	-1.14	4.9±0.2	4.9±0.2	5.0±0.2	47±8.4	113.2±6.5	76.8±2.0	4.56	0.664894	4.79	4.96	9.81	8.47	8.5	10.06	8.52	9.19	8.81	7.55	6.79	17.995	15.5975
1	S332	94	96	98.5	23	1.5	71	31.5556	25.4667	31.7778	41.8	35.1	46.4	102.5	0.917073	0.950495	0.951691	99	115	133	74	73	74	3.83	4.77	3.43	-0.94	0.4	5±0.2	4.8±0.1	5.1±0.1	87.6±1.3	74±5.5	70	5.43	0.837521	5.64	5.22	9.2	10.28	9.04	7.26	7.7	8	7.53	8.4	8.14	15.1675	16.525
1	S448	97	92	92.5	29	1.63	88	33.1213	31.5782	29.8092	45.3	43.7	39.8	110	0.881818	0.836364	0.833333	116	109	110	74	68	70	4.07	5.78	5.67	-1.71	-1.6	5.1±0.1	4.9±0.3	5.0±0.2	102.8±4.1	137±21.1	126.6±4.8	5.39	0.829187	5.11	5.33	9.06	8.2	9.6	9.63	6.21	7.87	7.51	6.06	5.36	16.855	13.065
1	S364	88	81	83.5	28	1.59	67.4	26.6603	25.0781	26.0275	35.7	35.3	35	97.5	0.902564	0.880435	0.883598	125	116	108	85	80	77	3.41	5.11	4.35	-1.7	-0.94	5.1	5.1±0.2	4.9±0.2	70	95	78±7.6	5.44	0.839631	5.51	5.13	7.6	6.62	7.65	5.31	4.88	7.3	6.28	5.55	6.09	12.2825	11.1225
1	s191	88.8	85.9	84.5	28.72	1.5824	71.188	28.4322	26.4429	25.9085	39.9	36.3	35.9	101.3	0.878096	0.875214	0.866178	116.72	111.32	112.68	74.08	73.8	73.24	3.76	5.11	5.27	-1.35	-1.15	4.0±0.1	4.7±0.4	5.1±0.1	46±8.4	115.2±7.5	79±2.0	5.34	0.819444	5.2028	5.1136	9.408	8.7056	8.6272	9.2464	8.4092	8.5568	7.8772	7.1344	7.0496	16.9118	15.5276
Total:26
IGT 13
IR-NG 13
[truncated: 51 more columns]

## Sheet: EHC
Diagnosis	Number	FtB（mg/L）-0min	FtB（mg/L）-80min	FtB（mg/L）-100min	FtB（mg/L）-120min	Age	Height	Weight	BMI	Fat%	SBP	DBP	WC	HC	WHR	M value	Blood glucose	GIR	OGTT-0	OGTT-30	OGTT-60	OGTT-120	0GTIR-0	0GTIR-30	0GTIR-60	0GTIR-120	SHBG(nmol/l)	DHEA-S(ug/dl)	E2(pg/ml)	TEST(ng/dl)	LH(mIU/ml)	FSH(mIU/ml)	PRL(ug/l)	Prog(ng/ml)	FAI	HbA1c	TG	TC	HDL	LDL	FFA
IGT	S439	11.8493	14.3857	17.7174	21.8573	24	1.64	73.8	27.439	40.1	136	90	88.5	99.5	0.889447	2.54	4.9±0.2	47±8.4	4.56	9.81	10.06	8.81	22.7	127	149	192	14.1	652.73	36.58	114.57	10.06	6.47	11.85	0.83		5.3	2.07	4.62	1.15	2.95	0.95
IGT	S433	1.1793	18.3	20.2686	19.4888	31	1.6	62.3	24.3359	36.8	122	66	84	96	0.875	3.28	4.9±0.1	60.6±1.3	5.39	8.42	9.73	7.98	22.17	180.7	235.2	250.5	27.4	356.58	51.8	49.66	4.6	6.25	23.89	0.17		5.3	2.97	6.05	1.15	4.02	0.81
IGT	S487		13.15	18.9244	15.5896	25	1.55	66.3	27.5963	38.5	114	76	94.5	103.5	0.913043	2.46	5.0±0.2	50.4±2.2	5.15	11.25	13.86	10.75	30.66	246.8	472.1	438.1	25	432.78	26.25	36.03	4.45	7.34	14.44	0.72		5.5	1.3	4.71	1.05	2.77	0.58
IGT	S254	7.5081	10.7338	10.6046	13.9462	29	1.58	68	27.2392	34.1	104	78	89	100	0.89	2.75	4.9±0.1	50.2±1.3	5.74	11.46	12.41	10.71	17.68	131.7	147.5	213.6	41.4	104.4	52.2	58.15	8.15	6.76	9.53	0.4		6	9.29	5.33	0.89	1.13	0.5
IGT	S445	11.3964	10.6906	11.0809	10.5616	28	1.55	64.4	26.8054	28	120	93	88	96	0.916667	3.72	5.2±0.2	65.4±5.1	5.27	9.49	11.11	8.03	35.3	265.4	425.8	364.8	12.5	342.6	29.85	60.23	1.51	4.64	10.22	0.19		5.8	2.29	5.71	1.19	3.28	0.78
IGT	S359	2.91204	7.80076	9.50639	10.263	26	1.57	53.3	21.6236	31.3	103	78	77	87	0.885057	4.08	5±0.1	59±8.9	5.06	10.38	9.83	9.19	24.99	265.9	241.1	298.2	35.3	287	49.97	66.19	8.41	5.91	8.45	0.84		5.5	4.78	4.75	0.94	2.36
IGT	S488	12.9651	15.2457	10.5616	8.56921	21	1.64	86.5	32.1609	44	105	66	107	119	0.89916	1.58	5.0±0.1	47.8±2.9	5.71	9.64	9.21	8.73	43.6	268.1	358	258.6	30.6	264.1	15.83	53.19	8.88	5.72	10.04	0.65		5.3	1.5	5.78	1.24	3.38	0.58
IGT	S210	1.19652	7.58523	7.01249	8.1712	20	1.61	77.7	29.9757	53.8	128	78	92	107	0.859813	4.62	5±0.3	107.8±1.4	5.89	10.32	11.94	9.32	17.54	88.84	163.4	213.7	17.2	272.7	54.8	60.66	6.5	9.21	12.47	0.38		6	1.38	5.16	1.3	3	0.27
IGT	S430	1.19782	6.77277	7.43485	8.1519	16	1.64	92	34.2058	47.5	102	67	100	113		2.83	5.2±0.2	64±15.2	5.36	10.78	12.33	12.85	71.98	525.7	785.2	1000	11.2	587.99	86.2	41.57	5.99	2.94	15.36	5.85		5.7	1.46	4.14	1.47	2.2	0.59
IGT	S288	1.17028	9.32815	8.03398	7.82393	30	1.58	71	28.441	39.1	113	79	93	102	0.911765	7.03	5.1±0.2	149±2.7	5.71	10.67	9.84	9.24	24.83	121.9	147.8	191.6	45.6	241.5	49.62	59.65	5.03	6.78	7.07	0.69		6.1	1.97	4.58	0.84	3.12	0.5
IGT	S475	8.77043	5.7991	6.71245	6.56384	25	1.53	54.4	23.2389	33.1	115	83	82	93	0.88172	3.42	5.0±0.1	55.6±2.6	5.22	9.17	10.03	7.97	6.2	83.31	120.7	147.7	21.5		69.93	97.6	12.25	9.56	7.83	0.54		6	1.15	4.33	1.3	2.44	0.88
IGT	S394	8.31678	5.37376	5.5146	6.37941	25	1.68	81	28.699	41.8	133	96	96	106	0.90566	2.51	4.9±0.2	59±11	6.28	11.89	11.9	10.35	30.41	171.2	215.6	303	20.7	419.9	43.8	55.6	8.64	6.84	7.68	0.38		6.1	1.75	5.5	0.95	4.19	0.53
IGT	S484	6.66259	10.1639	15.3037	16.2695	32	1.67	54.5	19.5418	27.5	101	54	76	97	0.783505	5.87	4.8±0.1	100.0±3.0	5.46	11.7	13.54	12.55	8.15	62.87	94.09	141.4	85.5	474.04	16.86	32.86	4.36	6.57	14.76	0.5		6.2	0.47	3.17	1.43	1.13
IGT	S485	5.62084	5.26875	5.87081	5.97883	30	1.58	67	26.8386	38.1	136	91	97	101	0.960396	5.01	5.0±0.2	100.4±8.6	5.26	8.06	10.34	10.15	11.27	80.15	172.2	228.4	18.5	386.92	37	62.99	12.11	9.84	21.99	0.34		5.5	1.59	4.45	1.28	2.51	0.56
IGT	S471	8.62681	4.48127	4.31419	5.37376	27	1.6	59.7	23.3203	35.6	102	64	89	97	0.917526	7.2	4.9±0.2	124.6±6.2	4.68	8.11	9.4	8.85	8.93	36.41	61.73	88.54	54.3	397.6	108.34	59.28	5.66	6.03	12.6	0.49		4.9	1.56	4.72	1.28	2.37	0.46
IGT	S486	5.65638	4.64981	5.19903	5.06032	33	1.6	54.2	21.1719	28.9	123	79	81.5	92	0.88587	2.9	4.9±0.2	47.0±6.1	4.66	8.47	11.03	8.82	16.6	93.43	167.2	282.7	35.5	23.64	20.29	10.42	6.64	6.45	6.23	0.12		5	4.26	8.95	1.8	5.47	0.41
IGT	S483	5.62084	3.53274	3.1236	3.06154	22	1.63	63.4	23.8624	34.8	111	77	88	96	0.916667	3.89	5.2±0.2	77.6±5.1	5.54	9.9	10.03	9.45	19.47	270.3	232.1	335.1	38.1	231.64	75.9	28.27	9.52	5.67	9.98	0.24		5.2	0.93	3.68	0.79	2.38	0.5
IR-NG	NS104-0	12.1449	9.02082	8.26082	8.97361	28	1.67	75.6	27.1075	38.1	120	80	93	104	0.894231	5.86	5.3±0.2	121.6±2.2	4.03	7.47	6.11	6.98	21.809	524.326	251.771	279.365	14.7	267	43.6	66.37	1.6	7.08	8.68	0.883	15.6669	4.9	0.66	3.61	1.42	1.6	0.39
IR-NG	S459	10.5763	8.48914	11.0809	6.48989	30	1.58	63.8	25.5568	35.2	115	63	82	89	0.921348	4.38	5.1±0.1	78	5.39	8.32	7.53	6.7	18.91	142.4	154.1	129			51.04	84.46	8.94	4.57	7.58	0.46		5.7	1.44	5.37	1.44	3.07	0.33
IR-NG	S369	9.25934	8.89186	10.4759	7.01249	28	1.63	64.1	24.1259	34.6	112	73	83	98	0.846939	4	5.1±0.2	68±4.5	5.22	9.51	7.12	6.21	6.79	11.15	118.8	92.99	72	174.5	58.57	40.2	4.08	6.78	14.68	1.06		5.5	4.42	1.26	1.23	2.73	0.48
IR-NG	S349	8.81085	8.51087	8.24686	7.96365	26	1.5	54.7	24.3111	33.8	106	73	78	91.5	0.852459	3.34	5.0±0.1	57	5.46	9.12	10.76	6.74	29.65	169	361.3	272.4	35.5	93.65	46.8	36.09	4.93	4.44	18.14	0.61			3.4	3.74	0.87	2.02
IR-NG	S481	8.3297	6.19644	7.58523	6.08737	26	1.65	60.8	22.3324	32.8	120	68	87	99	0.878788	5.49	4.9±0.2	102.2±11.2	4.28	8.23	7.02	6.47	9.93	164	120.2	108	38	213.87	14.9	27.46	2.05	5.72	32.42	0.34		5.2	1	4.83	1.26	2.36	0.37
IR-NG	S474	7.27812	5.94276	6.30604	5.69197	25	1.65	73.9	27.1442	40.2	103	72	90	106	0.849057	4.36	4.8±0.2	100.6±7.2	5.23	9.29	6.05	5.9	30.69	567	150.2	131.7	24.6	262.5	56.08	56.59	7.58	6.95	16.45	1.41		5.3	1.01	4.54	1.07	2.68	0.41
IR-NG	S476	6.862	5.44406	5.37376	5.90676	30	1.56	63.1	25.9287	38.3	102	67	90.5	97	0.93299	4.74	5.0±0.2	87.2±1.8	5.29	10.03	8.14	6.11	18.62	410.1	167.6	162.8	26.9	223.89	46.32	59.03	9.1	5.39	10.39	0.3		5	2.26	4.47	1.05	2.59	0.5
IR-NG	S360	6.84058	8.43845	9.76397	9.3789	23	1.6	70.2	27.4219	38.1	123	86	88	100	0.88	5.72	5±0.1	121±8.9	5.03	9.48	7.63	4.94	13.42	44.24	49.43	17.08	27.7	179	57.41	63.5	18	7.53	7.65	0.69		5.5	1.72	4.35	1.18	2.63	0.39
IR-NG	NS41-0	6.43205	4.31271	5.42371	4.79448	28	1.7	73.1	25.2941	37.8	110	72	86	102	0.843137	5.51	5.1±0.2	117.3±4.2	4.54	6.37	5.21	4.63	13.17	193.1	79.65	72.31	34.3	193.6	46.242	1.85784	5.87	7.05	391.564	4.368	5.41644	5.4	0.51	2.88	0.72	1.86	0.46
IR-NG	S477	4.51848	9.8824	7.14738	8.44919	25	1.6	70.7	27.6172	41.1	124	86	101.5	104	0.975962	4.81	5.0±0.2	109.4±1.7	5.12	6.31	6.99	7.04	12	42.62	69.28	63.94	31.1	240.19	77.48	49.95	12.13	7.95		0.31		5.1	1.43	5.7	1.29	3.16	0.59
IR-NG	S428	3.81016	8.46255	8.77908	8.65664	26	1.67	71.4	25.6015	35.4	119	76	82.5	100	0.825	4.18	4.7±0.2	98.4±5.9	6.23	10.31	10.99	7.55	21.74	142.7	164.3	96.77	71.7	440.18	49.54	41.18	1.2	7.29	18.47	0.56		5.7	1.67	3.32	1.03	1.6	1.15
IR-NG	S438	1.19437		10.9387	6.70828	34	1.58	83	33.2479	44.6	132	89	89.5	111.5	0.802691	4.19	5.2±0.2	89.2±42.2	5.25	10.43	10.51	7.75	16.3	131.4	180.1	160.8	38.5	203.52	30.51	55.78	1.43	4.48	11.2	0.5		5.5	1.52	3.49	0.94	1.64	0.77
IR-NG	S326	1.13382	10.2201	9.30047	7.46962	30	1.63	64.1	24.1259	34.5	107	76	85.5	100.5	0.850746	4.74	5.0±0.1	81.9±0.9	5.68	9.74	9.22	7.21	24.63	152.3	169.5	124.1	74.4	256.8	21.4	35.12	9.7	9.93	9.89	0.27		4.9	1.7	3.9	0.82	2.44	0.59
NGT	NS102-0	2.90742	5.89847	6.58025	6.47451	25	1.54	47.7	20.113	26.3	110	70	70	88	0.795455	8.81	4.8±0.3	132.5±16.6	4.41	5.82	5.46	5.62	7.436	137.919	61.88	27.595	55.1	164.6	30.9	32.75	5.28	6.02	19.8	0.392	2.06248	5.1	0.86	3.88	0.97	2.43	0.52
NGT	NS74-0	2.99972	4.6162	2.60654	3.81061	25	1.58	48.3	19.3479	26.4	110	80	68	89	0.764045	11.58	5.3±0.1	164.2±1.1	4.69	7.11	7.98	4.56	5.703	33.572	110.57	22.942	37.6	189.5	162.948	2.49077	4.43	7.19	406.828	3.432	6.62438	5.5	2.24	3.4	0.82	2.11	0.73
NGT	NS32-0	7.12198	6.24495	6.18308	4.93767	27	1.59	47.2	18.6701	24.2	108	76	69	90	0.766667	12.08	5.2±0.2	173±2.7	4.52	8.25	7.55	6.45	5.94	84.52	89.89	52.48	64.8	127.4	24.3	48.85	15.9	6.3	18.39	1.864	2.61589	5	0.74	1.96	0.52	1.13	0.2
NGT	NS92-0	4.48127	4.67594	5.02774	5.25591	25	1.58	48.5	19.428	25.9	115	76	75	90	0.833333	15.29	5.4±0.2	229±13.9	4.21	10.07	7.82	6.8	6.343	101.836	53.183	20.371	74.3	257	221.301	1.22144	2.77	9.09	228.748	2.496	1.64393	4.9	2.42	4.23	0.89	2.6	0.44
NGT	NS61-0	3.85422	3.68191	3.15439	4.12681	25	1.58	52	20.83	28.5	120	80	69	88	0.784091	11.46	5.1±0.2	177.8±4.7	4.89	6.27	3.49	4.25	7.117	88.763	33.051	18.952	79.9	182.8	251.395	3.7476	3.3	8.24	355.312	3.12	4.69036	5.3	0.51	3.53	1.15	2.07	0.16
NGT	NS62-0	7.07859	4.55614	3.87449	2.88301	25	1.56	42.3	17.3817	19.5	116	82	68	73	0.931507	10.59	5.0±0.1	124.8±0.4	4.36	6.56	6.21	5.7	5.681	127.781	103.792	54.216	67.4	161.6	108.265	1.70099	2.21	9.79	143.948	2.808	2.52373	5.4	0.43	2.57	0.69	1.56	0.35
NGT	NS72-0	6.74975	8.10463	9.86797	11.4106	24	1.5	56.9	25.2889	37.2	122	73	78	93	0.83871	7.6	4.7±0.2	126±3.7	4.44	8.28	6.84	5.66	9.945	221.308	395.795	181.096	38.7	216.3	48.7	85.26	3.67	5.6	18.07	0.392	7.64476	5.6	0.63	4.61	1.76	2.32	0.35
NGT	NS45-0	9.49769	3.55193	3.15439	4.43506	27	1.55	47.2	19.6462	25.8	108	72	69	89	0.775281	13.55	5.0±0.3	187.5±5.3	5.28	9.77	8.09	5.53	7.904	127.895	96.644	44.384	77.8	211.9	281.856	2.556	3.13	6.93	393.684	6.864	3.28535	5	0.84	4.45	1.55	1.51	0.72
NGT	NS57-0	5.7991	9.17673	7.89363	9.71217	24	1.56	51.9	21.3264	29.7	112	84	72	92	0.782609	12.12	5.4±0.3	199.0±13.4	4.04	7.75	8.01	5.33	9.308	88.926	65.94	116.238	92.5	239.1	64.3	54.07	5.74	7.72	11.23	0.981	2.02836	5.3	0.7	3.93	1.2	2.35	0.76
NGT	NS48-0	6.63793	4.49576	3.55193	3.81061	24	1.54	46.4	19.5649	25.4	108	76	70	86	0.813953	12.59	5.0±0.2	180±4.2	4	6.28	4.87	4.49	7.175	16.267	22.972	22.333	56.4	170	221.668	1.12983	2.4	10	207.76	2.184	2.00325	4.7	0.44	3.55	0.84	2.47	0.51
NGT	ns22-80'	3.59656	6.70828	6.70828	10.8564	30	1.5	57.6	25.6	31.7	110	70	84	97	0.865979	7.11	5.2±0.1	124.8±5.5	4.55	4.67	4.68	5.4	9.214	12.107	11.826	8.097	61.7	136.3	189	35.18	2.53	7.93	9.39	1.079	1.97852	5	2.98	4.04	0.95	2.25	0.59
NGT	NS84-80	9.76405	3.28818	3.87449	4.12681	25	1.61	51.6	19.9066	24.6	107	72	72	93	0.774194	8.63	5.1±0.3	127.6±3.3	4.03	4.12	4.3	3.19	4.108	77.956	38.245	8.561	53.4	305.2	311.216	1.73361	2.94	10.1	223.024	2.496	3.24646	5.21	1.37	3.16	0.96	1.88	0.88
NGT	NS41-0	6.43205	4.31271	5.42371	4.79448	28	1.7	73.1	25.2941	37.8	110	72	86	102	0.843137	5.51	5.1±0.2	117.3±4.2	4.54	6.37	5.21	4.63	13.17	193.1	79.65	72.31	34.3	193.6	46.242	1.85784	5.87	7.05	391.564	4.368	5.41644	5.4	0.51	2.88	0.72	1.86	0.46
NGT	NS94-100	8.80368	8.39034	7.52549	6.32794	25	1.62	47.3	18.0232	24.4	100	79	67	88	0.761364	7.72	5.1±0.2	101.4±1.7	3.89	7.36	5.53	5.19	6.646	58.692	25.179	25.034	47.7	92.4	27.3	29.83	4.07	11.3	20.8	0.392	2.17002	5.7	2.65	4.7	1.14	3.09	0.94
NGT	NS031-120	6.05113	9.3082	9.15465	6.11778	32	1.53	49.9	21.3166	27.7	100	78	67	94	0.712766	8.06	5.1±0.2	119.2±8.0	5	6.8	6	4.6	6.095	34.375	31.368	8.791	48.6	186.2	179.463	1.64131	6.08	9.98	403.224	2.808	3.37718	5	1.89	5.38	2.08	2.85	1.16
NGT	NS104-0	12.1449	9.48082	9.48082	11.6361	28	1.67	75.6	27.1075	38.1	120	80	93	104	0.894231	5.86	5.3±0.2	121.6±2.2	4.03	7.47	6.11	6.98	21.809	524.326	251.771	279.365	14.7	267	43.6	66.37	1.6	7.08	8.68	0.883	15.6669	4.9	0.66	3.61	1.42	1.6	0.39
NGT	NS037-0	4.24778	4.0642	4.9699	4.85327	29	1.5	41.2	18.3111	20.7	110	82	63	85	0.741176	15.24	5.2±0.3	186±6.4	3.51	6.28	4.87	4.49	7.175	16.267	22.972	22.333	75.6	142.5	178.729	1.22248	8.41	6.73	409.584	1.248	1.61704	5	2.09	4.4	1.46	2.39	0.7
NGT	NS107-0	9.25934	4.73537	5.90994	5.58865	24	1.6	53.4	20.8594	33.2	100	80	71	93	0.763441	6.7	4.9±0.3	101.4±7.1	4.41	6.35	4.79	4.76	6.417	97.548	36.4	22.547	32.5	398.5	185.335	2.72811	4.55	8.71	404.708	3.12	8.3942	5.3	0.89	5.69	1.62	3.57	0.67
NGT	NS77-0	5.40888	5.65994	4.43762	6.43246	23	1.62	53.1	20.2332	25.9	100	50	68	88	0.772727	8.73	5.34±0.19	146±8.94	4.68	9.59	6.59	7.33	8.31	38.81	39.118	20.598	43.9	167.1	86.2	30.99	4.38	7.67	19.11	0.981	2.44955	5.5	1.15	4.21	1.5	2.34	0.58
NGT	NS69-120	7.01001	4.79448	6.99016	5.31216	26	1.58	66.5	26.6384	36.6	120	88	79	101	0.782178	9.59	5.0±0.2	195.6±7.7	4.28	5.65	5.96	5.48	4.977	60.435	39.962	38.007	48.6	186.2	179.463	1.64131	6.08	9.98	403.224	2.808	3.37718	5	2.09	4.4	1.46	2.39	0.7
NGT	NS64-0		7.09989		9.17673	25	1.5	45.1	20.0444	25.3	106	77	66	84	0.785714	12.98	4.7±0.1	175±8.2	5	6.3	7.6	4.9	6.564	148.852	39.83	66.181	51.7	188.5	99.1	26.92	2.3	8.54	12.95	1.374	1.80682	5.2	0.53	3.56	1.22	1.92	0.7
NGT	NS43-0	3.72492	5.02774	3.48647	4.79448	25	1.65	60.2	22.112	30	110	78	77	97	0.793814	6.86	4.8±0.1	122.6±7.0	5.37	8.41	6.8	7.33	14.61	109.1	67.05	82.16	38.9	205.8	344.98	2.02891	3.99	9.87	415.096	3.432	5.2157	5	0.81	4.27	1.18	2.63	0.19
NGT	NS58-0	5.23386	3.81061	4.55614	2.95133	25	1.64	47.7	17.735	22.2	120	80	69	82	0.841463	8.31	4.9	118.4±3.9	4.37	5.72	5.43	4.66	7.01	200.602	88.225	57.015	57.2	176.3	278.92	2.22566	4.38	11.9	404.708	3.432	3.89101	5.2	5.62	4.38	0.93	2.9	1
NGT	NS55-0	3.72492	6.27033	4.31271	5.19935	25	1.58	62.4	24.996	28.9	112	78	74	90	0.822222	9.73	4.8±0.2	146.7±3.7	4.68	7	4.82	4.73	9.777	118.718	56.622	12.531	43.3	190.9	173.224	1.5039	2.02	6.37	280.264	1.872	3.47321	4.9	0.45	3.31	1.51	1.42	0.22
NGT	NS93-0	4.38085	11.9212	13.3683	13.8899	25	1.6	49.2	19.2188	23.1	109	68	60	90	0.666667	10.29	4.9±0.2	160.0±2.7	5.04	8.72	8.13	5.8	4.556	22.517	43.038	32.907	89.1	112	93.8	44.35	7.02	9.29	19.68	0.587	1.72721	5.3	1.65	4.53	0.93	3.17	0.88
NGT	NS27-0	6.12367	4.6162	3.08702	3.48647	25	1.53	51.3	21.9146	28.8	110	72	73	91	0.802198	9.14	5.0±0.2	135.3±2.9	4.64	7.89	7.07	7	7.654	31.138	48.391	35.742	81.5	181.3	192.308	1.4456	2.6	8.37	126.988	3.12	1.77374	5.5	1.03	4.37	1.15	2.71	0.44
NGT	NS111-0	4.1486	6.51822	7.6792	7.47261	25	1.56	48.7	20.0115	27.2	114	70	70	86	0.813953	13.31	4.7±0.2	188.6±0	4.41	5.82	5.46	5.62	7.142	32.385	31.662	19.478	30.1	280.8	220.567	2.11843	8.82	7.14	403.012	4.368	7.03799	5	1.18	6.26	1.01	4.88	0.57

## Sheet: OGTT
Diagnosis	Number	FtB（mg/L）-0min	FtB（mg/L）-30min	FtB（mg/L）-60min	FtB（mg/L）-120min	AUC	Age	Height	Weight	BMI	Fat%	SBP	DBP	WC	HC	WHR	M value	Blood glucose	GIR	OGTT-0	OGTT-30	OGTT-60	OGTT-120	0GTIR-0	0GTIR-30	0GTIR-60	0GTIR-120	SHBG(nmol/l)	DHEA-S(ug/dl)	E2(pg/ml)	TEST(ng/dl)	LH(mIU/ml)	FSH(mIU/ml)	PRL(ug/l)	Prog(ng/ml)	FAI	HbA1c	TG	TC	HDL	LDL	FFA
IGT	S314	9.02844	22.1142	24.7094	18.025	40.8587	29	1.6	75.1	29.3359	42.9	109	73	96.5	100	0.965	3.07	4.8±0.2	56.8±6.4	5.03	11.54	13.5	8.08	35.16	287.5	739.2	492.9	23.6	437.9	54.53	73.62	5.35	5.3	26.62	0.31		5.2	1.2	4.14	0.78	2.6	0.49
IGT	S270	19.1235	18.8067	19.267	18.6358	37.9524	35	1.64	68.3	25.3941	36.1	104	76	81	105	0.771429	6.32	4.8±0.1	129.4±1.3	5.99	10.58	8.91	8	21.81	126.7	142.4	114.6	55.8	83.24	43.7	69.95	11.07	8.25	8.5	0.22		5.8	1.33	5.18	1.48	2.84	0.44
IGT	S017	12.6483	15.9568	15.7432	16.3174	31.1065	23	1.58	63	25.2363	36.2	145	75	82.5	95	0.868421				4.65	9.5	11.6	10.51	21.52	115.4	176.2	301.9	54.17	8.93	7.11	20.28	0.17	5.3	0.98	4.71		1.3	2.87	0.67
IGT	S316	8.52048		7.04191	6.32812	10.5756	27	1.61	73.8	28.4711	40.1	108	64	88	106.5	0.826291	2.79	4.9±0.1	53.8±4.6	6.54	11.25	13.82	11.08	24.22	170.2	232.8	218.6	34.4	390.1	66.6	82.55	9.73	5.99	10.36	0.46		6.2	0.53	3.13	1.06	1.81	0.64
IGT	S265	17.9735	15.7284	16.2307	13.7696	31.4154	32	1.61	72.1	27.8153	70.1	120	62	93.5	101	0.925743	3.21	5.0±0.2	75±7.1	5.15	9.06	11.23	11.03	17.97	113.3	132.1	214.9	88.4	199	25.3	36.47	0.38	3.17	15.92	0.72		5.5	3.04	3.71	1	1.73	0.71
IGT	IR40	9.93554	11.0006	8.02007	15.8638	21.9311	24	1.54	57.8	24.3717	35.7	127	82	78.9	91.5	0.862295	3.05	4.9±0.2	46.8±4.1	5.11	8.67	10.7	8.71	24.02	161.8	315.2	334.3	38.2	199.3	53.78	87.46	13.88	6.69	11.67	0.49		5.5	1.48	4.15	0.92	3.06	0.4
IGT		8.77352	9.54395	4.83985	5.63131	13.4109	22	1.63	63.4	23.8624	34.8	111	77	88	96	0.916667	3.89	5.2±0.2	77.6±5.1	5.54	9.9	10.03	9.45	19.47	270.3	232.1	335.1	38.1	231.64	75.9	28.27	9.52	5.67	9.98	0.24		5.2	0.93	3.68	0.79	2.38	0.5
IGT	S273	20.2267	22.3362	22.3156	23.2234	44.5731	29	1.65	80.5	29.5684	43.3	103	74	9 5	100	0.95	2.83	4.9±0.1	68.4±0.9	5.59	9.47	8.51	8	18.28	218.7	220.2	248.7	28.2	165.3	54.5	36.36	11.87	8.95	7.28	0.13		6.2	1.13	3.71	0.81	2.55	0.38
IGT	S427	22.0131	19.5328	24.9703	23.5077	45.7513	28	1.55	53.5	22.2685	31.8	115	86	73	89	0.820225	4.1	5.1±0.1	66±2.2	5.57	11.45	9.56	8.33	9.59	106.4	109.7	129.6	32.8	241.72	9.61	52.3	4.84	8.35	17.03	0.83		5.4	1.53	5.63	1.55	3.23	0.96
IGT	S447	17.3696	17.9351	17.5389	17.6899	35.3091	24	1.58	77.2	30.9245	43.7	112	77	96	102	0.941176	2.94	5.2±0.1	65±7.1	5.5	7.71	9.44	8.12	49.76	222.2	331	446.1	8.6	406.74	35.29	67.69	3.83	6.08	8.94	0.44		5.9	1.57	3.6	0.8	2.09
IGT	IRV1	4.85327	3.08702	3.93804	3.61708	7.5189	34	1.63	61.3	23.072	32.9	112	64	85	96	0.885417	2.98	5.4±0.1	53.4±0.9	5.97	9.73	10.37	7.95	21.55	189.7	204.8	188.9	28.5	131.2	27.9	36.32	4.04	9.98	11.36	0.23		5.5	2.95	4.57	0.87	2.35	0.41
IGT	S268	19.1876	19.5951	19.9885	19.8921	39.5318	29	1.59	66.3	26.2252	35	102	64	84	96	0.875	4.03	5.0±0.2	84.8±3	5.35	8.77	10.4	9.1	17.31	117.8	152.7	228.6	19.9	494.8	34.97	70.19	3.99	4.61	8.64	0.77		5.6	1.53	4.3	0.99	2.57
IGT	S450	21.8507	21.8507	20.6198	19.9482	41.8269	32	1.6	80	31.25	44.6	117	86	95	105	0.904762	2.99	5.4±0.1	75.6±8.9	5.39	9.95	10.01	8.69	39.12	252.3	316.2	498.4	16.9	269	35	59.48	6.99	5.48	6.73	0.12		5.9	1.18	4.28	1.46	2.11	0.52
IGT	S056	21.2728	12.3743	9.02844	11.8191	24.1862	27	1.53	46	19.6506	24.3	120	81	79	88.5	0.892655				4.59	10.9	9.31	10.55	12.22	146.3	98.96	176.4	40.35	17.49	5.29	8.62	0.3	5.3	1.24	4.81		1.7	1.82	0.56
IGT	S315	8.81085	16.4719	12.3743	18.6594	29.0491	30	1.6	73.4	28.6719	41.6	112	68	92	100	0.92	2.9	5.0±0.2	52±3.1	6.34	11.19	14.07	11.06	43.75	72.67	288.8	355.2	27.8	593.8	28.03	78.05	2	5.52	6.44	0.51		5.5	2.4	4.76	1.13	3.11	0.39
IGT	S310		9.02844	11.6815	20.9395	23.7451	32	1.65	83.4	30.6336	41.8	132	84	98.5	109	0.90367	2.71	5.0±0.2	51.4±3.4	7.01	12.13	16.65	12.88	40.89	81.61	180.2	343.7	49.6	57.6	64.2	112.04	7.73	6.1	16.89	0.24		6.2	2.41	4.48	0.79	2.58	0.42
IGT	S445	22.5025	20.3359	19.7108	20.3359	40.7447	28	1.55	64.4	26.8054	28	120	93	88	96	0.916667	3.72	5.2±0.2	65.4±5.1	5.27	9.49	11.11	8.03	35.3	265.4	425.8	364.8	12.5	342.6	29.85	60.23	1.51	4.64	10.22	0.19		5.8	2.29	5.71	1.19	3.28	0.78
IGT	S445	10.4643	14.966	7.04191	12.2348	21.4979	28	1.55	64.4		28	120	93	88	96	0.916667	3.72	5.2±0.2	65.4±5.1	5.27	9.49	11.11	8.03	35.3	265.4	425.8	364.8	12.5	342.6	29.85	60.23	1.51	4.64	10.22	0.19		5.8	2.29	5.71	1.19	3.28	10.4643
IGT	S268	16.4899	18.9284	21.4902	20.152	39.7804	24	1.55	73.4	30.5515	43.7	125	70	105	107	0.981308	2.81	4.8±0.1	58.2±1.6	5.12	10.48	9.64	9.29	22.83	386.4	364.3	559.2	36.7	178.4	184	26.99	4.75	4.05	22.92	0.1		5.8	1.08	3.82	0.87	2.38	0.24
IGT	S264	21.6058	23.0695	22.7669	19.4289	43.7258	35	1.63	93.4	35.1538	44.5	130	80	102	113	0.902655	3.02	4.7±0.1	76.4±4.5	6.22	10.89	13.27	8.9	33.21	199.6	510.8	421.7	20.2	126.3	43.5	57.33	5.56	6.67	13.08	0.13		6.3	1.62	4.99	0.86	3.47	0.47
IR	S266	21.3381	20.5501	19.9562	19.8523	40.5029	24	1.56	51.4	21.121	27	124	72	78	90	0.866667	6.8	5.2±0.1	102.2±2.2	5.05	9.46	7.63	7.61	16.81	142.9	151.7	170.6	29.1	213.9	31.6	67.5	11.53	7.92	53	0.54		5.2	1.28	4.2	1.16	2.33
IR	S203	21.2535	18.8268	20.1355	21.0956	40.3762	29	1.6	60.9	23.7891	36.5	120	63	87	99	0.878788	5.96	4.7±0.2	100.4±9.5	4.9	9.37	9.59	7.23	5.96	70.71	75.95	78.09	38.2	97.04	63.58	50.32	17.03	5.93	5.33	0.86		5.3	0.97	4.91	1.02	3.53	0.41
IR	S271	19.8127	18.8402	18.4523	19.5114	37.9682	28	1.65	64.6	23.7282	34.9	110	80	81	101	0.80198	5.57	5.3±0.1	108	4.89	7.78	7.56	7.03	12.03	105.5	129	120.9	35.6	141.1	100.69	70.83	1.14	1.43	21.55	4.14		5.3	0.73	4.08	1.33	2.07	0.5
IR	S263	19.5798	18.5717	17.2247	19.9401	37.0694	22	1.55	56.6	23.5588	34.6	112	85	79	94	0.840426	4.81	5.2±0.1	83±2	4.74	8.79	8.14	6.23	8.41	74.06	82.16	74.77	43.2	311.1	46.9	74.46	17.12	8.98	14.24	0.27		5.1	0.99	3.74	1.08	2.32	0.37
IR	S263	8.90074	10.7315	8.64676	11.4077	19.7798	22	1.55	56.6	23.5588	34.6	112	85	79	94	0.840426	4.81	5.2±0.1	83±2	4.74	8.79	8.14	6.23	8.41	74.06	82.16	74.77	43.2	311.1	46.9	74.46	17.12	8.98	14.24	0.27		5.1	0.99	3.74	1.08	2.32	0.37
IR	S260	19.159	18.8268	18.5211	18.2761	37.232	30	1.57	52.5	21.299	29.9	102	64	70	94	0.744681	4.31	5.5±0.2	62.6±1.3	4.88	8.69	6.36	6.11	6.98	70.29	117.5	61.05	45.3	174	35.33	50.94	9.47	6.48	22.16	0.8		5.6	0.65	4.85	1.53	2.93	0.34
IR	S272	21.4711	20.1108	20.2351	20.1768	40.6879	26	1.68	79.9	28.3092	41.7			88	106	0.830189	3.55	5.0±0.2	93.8±1.1	5	7.22	5.14	5.6	18.28	246.8	111	90.28	28.3	232.9	4.124.7	33.59	3.05	13.72	13.21	0.55		4.7	1.71	3.67	0.91	2.32
IR		5.97759	7.28362	7.28362	7.52722	14.3625	23	1.66	61.5	22.3182	29.3	114	57	82	95	0.863158				5.32	5.41	5.62	5.21	13.79	43.74	85.12	61.59		18.53	7.21	12.89	0.17	5.1	1.13	4.53		1.27	2.25	0.29
IR	IR	5.40282	20.9395	18.025	9.54395	30.1112
IR	IR221	8.52048	7.16253	5.06362	7.28362	13.1509
IR	NS101-0	1.17242	4.9515	5.40282	9.54395	11.5929	24	1.53	51.9	22.171	31.1	111	71	71	91	0.78022	4.51	4.8±0.2	62.4±10.2	4.48	9.07	7.33	6.58	9.865	82.23	107.308	71.428	19.2	281.1	153.773	3.43287	3.81	7.29	302.736	3.12	17.8795	5.3	1.26	3.38	1.48	0.96	0.65
NGT	NS102-0	0.907548	4.61797	4.39797	5.51683	8.59276	25	1.54	47.7	20.113	26.3	110	70	70	88	0.795455	8.81	4.8±0.3	132.5±16.6	4.41	5.82	5.46	5.62	7.436	137.919	61.88	27.595	55.1	164.6	113.403	1.13643	5.28	6.02	417.852	1.248	2.06248	5.1	0.86	3.88	0.97	2.43	0.52
NGT	NS015-0	8.42815	5.63131	6.56416	6.66314	13.1774	24	1.58	45.1	18.066	22.2	102	78	61	81	0.753086	10.3	5.0±0.1	141.3±12.7	4.48	7.09	3.4	4.25	5.25	117.8	27.7	37.41	87.4	151.6	93.585	1.35399	2.21	6.79	143.948	2.808	1.54919	5	0.48	2.35	0.92	1.11	0.22
NGT	NS63-0	3.27979	5.40282	5.63131	6.68289	11.0863	24	1.63	55.2	20.7761	28.2	103	91	74	92	0.804348	11.57	4.93±0.17	191±6.52	5.19	5.58	6.38	3.82	7.475	32.511	34.84	31.511	40.8	212.1	182.399	3.41379	6.37	9.3	184.228	1.56	8.36712	5.1	0.57	3.1	1.4	1.21	0.18
NGT	NS28-0	6.89954	12.19	5.83493	5.83493	15.1135	27	1.58	48.3	19.3479	23	108	70	67	88	0.761364	11.92	5.1±0.3	164.2±0.8	3.98	6.39	6.42	5.46	7.443	28.493	37.019	23.183	55.7	106.4	48.444	1.59551	6.84	5.72	410.432	3.12	2.86446	5.1	0.57	3.26	1.34	1.48	0.49
NGT	NS74-0	1.05793	18.1705	18.3907	19.1022	32.6939	25	1.58	48.3	19.3479	26.4	110	80	68	89	0.764045	11.58	5.3±0.1	164.2±1.1	4.69	7.11	7.98	4.56	5.703	33.572	110.57	22.942	37.6	189.5	44.4	71.78	4.43	7.19	19.19	1.079	6.62438	5.5	2.24	3.4	0.82	2.11	0.73
NGT	NS92-0	1.09367	18.288	19.7108	20.3275	34.3643	25	1.58	48.5	19.428	25.9	115	76	75	90	0.833333	15.29	5.4±0.2	229±13.9	4.21	10.07	7.82	6.8	6.343	101.836	53.183	20.371	74.3	257	60.3	35.2	2.77	9.09	10.79	0.785	1.64393	4.9	2.42	4.23	0.89	2.6	0.44
NGT	NS61-0	1.12954	9.42979	7.68546	8.53508	15.0289	25	1.58	52	20.83	28.5	120	80	69	88	0.784091	11.46	5.1±0.2	177.8±4.7	4.89	6.27	3.49	4.25	7.117	88.763	33.051	18.952	79.9	182.8	68.5	108	3.3	8.24	16.84	0.981	4.69036	5.3	0.51	3.53	1.15	2.07	0.16
NGT	NS48-0	3.59656	5.87081	7.27812	6.12367	12.355	24	1.54	46.4	19.5649	25.4	108	76	70	86	0.813953	12.59	5.0±0.2	180±4.2	4	6.28	4.87	4.49	7.175	16.267	22.972	22.333	56.4	170	221.668	1.12983	2.4	10	207.76	2.184	2.00325	4.7	0.44	3.55	0.84	2.47	0.51
NGT	NS96-0	0.853812	11.2715	7.16253	4.9515	13.6969	24	1.67	60.5	21.6931	25.5	104	71	80	93	0.860215	9.54	5.2±0.1	172.2±1.1	3.9	8	4.66	4.99	7.656	141.082	15.869	53.154	55.9	133.9	253.964	1.13781	6.14	8.58	364.64	1.56	2.03544	5.2	1.06	3.82	1.18	2.15	0.43
NGT	NS106-0	1.08089	13.6633	8.68976	8.21074	17.7245	24	1.62	52.5	20.0046	22.7	118	63	69	94	0.734043	10.91	4.9±0.2	172.4±17.5	4.43	6.21	4.82	7.56	7.299	48.87	39.957	24.294	32	551.4	170.655	3.26111	3.86	7.35	378.208	2.184	10.191	5.4	0.68	3.79	1.07	2.29	0.71
NGT	NS01-0	1.15696	6.92177	8.90074	11.4077	16.1295	27	1.65	54	19.8347	22.5	108	58	69	89	0.775281	8.83	4.6±0.3	113.8±24.9	4.73	4.87	3.98	3.65	7.24	16.59	15.24	6.22	32.1	240.8	246.257	1.77144	7.82	8.04	403.012	4.368	5.51849	5.2	0.84	3.74	1.16	2.07	0.67
NGT	NS107-0	9.25934	12.2351	7.85703	8.1712	18.4108	24	1.6	53.4	20.8594	33.2	100	80	71	93	0.763441	6.7	4.9±0.3	101.4±7.1	4.41	6.35	4.79	4.76	6.417	97.548	36.4	22.547	32.5	398.5	185.335	2.72811	4.55	8.71	404.708	3.12	8.3942	5.3	0.89	5.69	1.62	3.57	0.67
NGT	NS68-120	6.31132	4.83985	5.40282	5.74627	10.923	24	1.58	51.1	20.4695	27.7	109	74	72	86	0.837209	6.67	4.6±0.2	91.6±8.0	3.77	6.18	5.54	4.63	7.924	75.404	40.754	70.632	42.1	237.2	205.887	1.78115	2.69	6.15	304.856	3.12	4.23076	5.3	0.57	3.03	0.92	1.76	0.35
NGT	NS77-0	5.40888	7.89363	6.34878	5.83836	12.9798	23	1.62	53.1	20.2332	25.9	100	50	68	88	0.772727	8.73	5.34±0.19	146±8.94	4.68	9.59	6.59	7.33	8.31	38.81	39.118	20.598	43.9	167.1	86.2	30.99	4.38	7.67	19.11	0.981	2.44955	5.5	1.15	4.21	1.5	2.34	0.58
NGT	ns78	1.19308	17.8866	18.5211	17.9405	32.1026	26	1.5	41.2	18.3111	23.3	120	70	68	72	0.944444	7.11	5.1±0.25	85±13.69	4.32	11.04	7.67	6.77	6.731	233.205	49.684	91.724	30.6	213.5	122	99.93	16.9	9	16.28	0.883	11.3319	5.3	0.47	3.09	0.99	1.73	0.31
NGT	ns103	9.13846	7.85703	7.75961	8.28689	16.1763	28	1.67	50.8	18.2151	21.7	125	84	72	89	0.808989	11.59	5.0±0.1	180±0.0	4.43	4.69	2.95	3.23	6.253	47.449	9.733	39.2	64.3	207	184.601	0.87444	1.77	9.19	228.748	2.496	1.35994	5.4	0.25	2	0.73	0.98	0.26
NGT	NS91-0	1.09153	7.16253	12.2348	7.16253	16.6115	40	1.5	66	29.3333	43.9	120	85	88	93	0.946237	6.3	5.3±0.2	127±16.0	4.86	5.77	5.65	5.39	7.027	44.431	56.363	26.928	78	155.4	220.934	2.09796	7.54	7.58	403.012	3.432	2.68969	5.3	1.15	3.17	1.39	1.11	0.88
NGT	NS67-120	7.39659	8.52048	7.40518	9.28525	16.3059	24	1.54	48.9	20.619	26.7	120	84	70	88	0.795455	8.15	4.7±0.1	121.2±5.8	3.78	7.34	7.02	6.99	6.549	54.773	45.49	74.547	60	189.2	233.779	2.68474	3.64	9.73	409.584	2.496	4.47457	5.4	0.78	2.93	0.88	1.61	0.28
NGT	NS64-0	1.0762	8.53508	4.95603	10.7745	13.6409	25	1.5	45.1	20.0444	25.3	106	77	66	84	0.785714	12.98	4.7±0.1	175±8.2	5	6.3	7.6	4.9	6.564	148.852	39.83	66.181	51.7	188.5	99.1	26.92	2.3	8.54	12.95	1.374	1.80682	5.2	0.53	3.56	1.22	1.92	0.7
NGT	NS43-0	1.07918	18.4337	17.5389	17.4642	31.3729	25	1.65	60.2	22.112	30	110	78	77	97	0.793814	6.86	4.8±0.1	122.6±7.0	5.37	8.41	6.8	7.33	14.61	109.1	67.05	82.16	38.9	205.8	94	58.47	3.99	9.87	19.58	1.079	5.2157	5	0.81	4.27	1.18	2.63	0.19
NGT	NS56-0	1.32141	11.0764	7.89363	11.8639	17.7207	27	1.6	47.5	18.5547	22.2	100	80	64	82	0.780488	13.54	5.1±0.2	187.6±5.1	4.59	9.09	6.16	6.25	7.19	288.308	76.079	110.234	71.3	127.2	52.7	28.87	3.98	8.73	17.97	0.687	1.40503	5.7	0.86	4.6	1.63	2.47	0.64
NGT	NS58-0	5.23386	18.7271	18.8067	17.3001	33.4271	25	1.64	47.7	17.735	22.2	120	80	69	82	0.841463	8.31	4.9	118.4±3.9	4.37	5.72	5.43	4.66	7.01	200.602	88.225	57.015	57.2	176.3	76	64.14	4.38	11.9	19.09	1.079	3.89101	5.2	5.62	4.38	0.93	2.9	1
NGT	NS017	7.11911	4.25106	5.47901	4.25106	10.1401	24	1.58	46.4	18.5868	23.2	104	82	61	83	0.73494	15.66	4.7±0.2	220.0±15.8	4.97	8.02	5.61	4.45	9.89	87.99	79.44	46.13	75.7	106.4	74.134	1.24851	6.84	6.72	410.432	2.184	1.64928	4.9	0.74	1.96	0.52	1.13	0.2
NGT	NS55-0	0.893354	19.2163	19.9401	19.3621	34.4677	25	1.58	62.4	24.996	28.9	112	78	74	90	0.822222	9.73	4.8±0.2	146.7±3.7	4.68	7	4.82	4.73	9.777	118.718	56.622	12.531	43.3	190.9	47.2	43.34	2.02	6.37	13.28	0.589	3.47321	4.9	0.45	3.31	1.51	1.42	0.22
NGT	NS93-0	1.12697	23.0403	16.8529	22.1697	35.5264	25	1.6	49.2	19.2188	23.1	109	68	60	90	0.666667	10.29	4.9±0.2	160.0±2.7	5.04	8.72	8.13	5.8	4.556	22.517	43.038	32.907	89.1	112	93.8	44.35	7.02	9.29	19.68	0.589	1.72721	5.3	1.65	4.53	0.93	3.17	0.88
NGT	NS27-0	1.16985	7.34476	7.25523	10.0513	14.4319	25	1.53	51.3	21.9146	28.8	110	72	73	91	0.802198	9.14	5.0±0.2	135.3±2.9	4.64	7.89	7.07	7	7.654	31.138	48.391	35.742	81.5	181.3	52.4	41.66	2.6	8.37	6.02	0.981	1.77374	5.5	1.03	4.37	1.15	2.71	0.44
NGT	NS111-0	4.1486	19.7498	18.8	21.8705	35.9473	25	1.56	48.7	20.0115	27.2	114	70	70	86	0.813953	13.31	4.7±0.2	188.6±0	4.41	5.82	5.46	5.62	7.142	32.385	31.662	19.478	30.1	280.8	60.1	61.05	8.82	7.14	19.1	1.374	7.03799	5	1.18	6.26	1.01	4.88	0.57
