# Supplementary material for: Association of serum fetuin-B with insulin resistance and pre-diabetes in young Chinese women: evidence from a cross-sectional study and effect of liraglutide
Source: PeerJ. 2021 Aug 20;9:e11869. doi: 10.7717/peerj.11869 (PMC8381879; doi:10.7717/peerj.11869)
Supplement: Supplemental Information 5 [file peerj-09-11869-s005.xlsx]

## Sheet: Sheet1
codebook
Group
0	NGT
1	IGT
2	IR
IR
0	IR group
1	non-IR group
